# Supplementary material for: Differences in infant and child mortality before and after the Great East Japan Earthquake and Tsunami: a large population-based ecological study
Source: PubMed Central journal article supplement — BMJ Open. 2018 Nov 25;8(11):e022737. doi: 10.1136/bmjopen-2018-022737 (PMC6254400; doi:10.1136/bmjopen-2018-022737), 2018-11-25
Supplement: bmjopen-2018-022737.draft_revisions.pdf [file bmjopen-2018-022737.draft_revisions.pdf]

# BMJ Open

BMJ Open is committed to open peer review. As part of this commitment we make the peer review history of every article we publish publicly available.

When an article is published we post the peer reviewers' comments and the authors' responses online. We also post the versions of the paper that were used during peer review. These are the versions that the peer review comments apply to.

The versions of the paper that follow are the versions that were submitted during the peer review process. They are not the versions of record or the final published versions. They should not be cited or distributed as the published version of this manuscript.

BMJ Open is an open access journal and the full, final, typeset and author-corrected version of record of the manuscript is available on our site with no access controls, subscription charges or pay-per-view fees (<http://bmjopen.bmj.com>).

If you have any questions on BMJ Open's open peer review process please email [info.bmjopen@bmj.com](mailto:info.bmjopen@bmj.com)

# BMJ Open

## Differences in infant and child mortality before and after the Great East Japan Earthquake and Tsunami: A large population-based ecological study

|                               |                                                                                                                                                                                                                                                                                                                                                                                                                                                                             |
|-------------------------------|-----------------------------------------------------------------------------------------------------------------------------------------------------------------------------------------------------------------------------------------------------------------------------------------------------------------------------------------------------------------------------------------------------------------------------------------------------------------------------|
| Journal:                      | <i>BMJ Open</i>                                                                                                                                                                                                                                                                                                                                                                                                                                                             |
| Manuscript ID                 | bmjopen-2018-022737                                                                                                                                                                                                                                                                                                                                                                                                                                                         |
| Article Type:                 | Research                                                                                                                                                                                                                                                                                                                                                                                                                                                                    |
| Date Submitted by the Author: | 22-Mar-2018                                                                                                                                                                                                                                                                                                                                                                                                                                                                 |
| Complete List of Authors:     | Tashiro, Ai; Tohoku University, Graduate School of Tohoku University Sakisaka, Kayako; National Center of Neurology and Psychiatry, National Institute of Mental Health, Japan Support Center for Suicide Countermeasures; Teikyo University Graduate School of Public Health Okamoto, Etsuji; The University of Fukuchiyama Yoshida, Honami; Kanagawa Prefectural Government, Healthcare New Frontier Promotion Headquarters Office; Kanagawa University of Human Services |
| Keywords:                     | Great East Japan Earthquake and Tsunami, population-based ecological study, vulnerability, child healthcare disparities, infant and child mortality, GIS                                                                                                                                                                                                                                                                                                                    |
|                               |                                                                                                                                                                                                                                                                                                                                                                                                                                                                             |

SCHOLARONE™  
Manuscripts

**Research article**

Differences in infant and child mortality before and after the Great East Japan Earthquake and Tsunami: A large population-based ecological study

1  
2  
3  
4  
5  
6  
7  
8  
9  
10  
11  
12  
13  
14  
15  
16  
17  
18  
19  
20  
21  
22  
23  
24  
25  
26  
27  
28  
29  
30  
31  
32  
33  
34  
35  
36  
37  
38  
39  
40  
41  
42  
43  
44  
45  
46  
47  
48  
49  
50  
51  
52  
53  
54  
55  
56  
57  
58  
59  
60

For peer review only

Ai Tashiro<sup>1\*</sup>, Kayako Sakisaka<sup>2,3</sup>, Etsuji Okamoto<sup>4</sup> and Honami Yoshida<sup>5,6</sup>

**Author affiliations**

<sup>1</sup>Graduate school of Environmental Studies, Tohoku University, Miyagi, Japan.

<sup>2</sup>National Center of Neurology and Psychiatry, National Institute of Mental Health, Japan Support Center for Suicide Countermeasures, Tokyo, Japan,

<sup>3</sup>Teikyo University Graduate School of Public Health, Tokyo, Japan.

<sup>4</sup>Department of Health and Welfare Management, the University of Fukuchiyama, Kyoto, Japan.

<sup>5</sup>Healthcare New Frontier Promotion Headquarters Office, Kanagawa Prefectural Government, Kanagawa, Japan.

<sup>6</sup>Kanagawa University of Human Services, Kanagawa, Japan

Correspondence to:

Ai Tashiro; ai.tashiro.d4@tohoku.ac.jp. Tel:+81-22-752-2266.

Graduate School Environmental Studies, Tohoku University, Japan.

Aramaki 468-1 Aoba, Aoba-ku, Sendai, Miyagi, 9800845, Japan.

---

\*Correspondence: atashiro11@gmail.com

<sup>1</sup>Graduate school of Environmental Studies, Tohoku University, Japan.

Full list of author information is available at the end of the article.

## Abstract

**Objectives:** To examine the associations between the different characteristics of medical care with geological information and the influence of changes in normal and emergency situations on infant and child mortality in northeastern Japan, where the Great East Japan Earthquake and Tsunami (GEJET) struck in 2011.

**Design:** Large population-based ecological study using online data

**Setting:** A total of 20 Secondary Medical Area (SMA) in the disaster-affected zones in the northeastern prefectures (Iwate, Fukushima, and Miyagi).

**Participants:** A total of 1 748 children under 10 years died in the 20 SMA in the disaster-affected zone from 2008 to 2014. Meanwhile, 771 children died in 2011.

**Primary and secondary outcome measures:** Multiple regression analysis for infant and child mortality rate was employed. The mean values were applied for infant and child mortality rates and other factors before GEJET (2008–2010) and after GEJET (2012–2014).

**Results:** Mortality rate per 100 000 persons was  $39.1 \pm 41.2$  before 2011,  $226.7 \pm 43.4$  in 2011, and  $31.4 \pm 39.1$  after 2011. The most common cause of death among children under 10 years old was accidents during 2008–2014. Regarding mortality rate, the results of regression analysis showed that the mortality rate was positively associated with low age in each period, while coastal zone was negatively associated with disaster base hospitals (DBH) in 2011. By contrast, the Ob-Gyn ( $\beta = -189.9$ ,  $p = 0.02$ ) and public health nurses ( $\beta = -1.7$ ,  $p = 0.01$ ) were negatively associated with mortality rate in 2011.

**Conclusions:** The mortality rate of children under 10 years old in 2011 was 6.4 times higher than before and after 2011. In particular, child mortality rates were significantly influenced by residence in coastal zones where local medical resources for child healthcare are limited. The mortality rate was 12-fold higher in these coastal zones than in inland zones.

**Keywords:** *Great East Japan Earthquake and Tsunami, population-based ecological study, vulnerability, child healthcare disparities, infant and child mortality, GIS*

### Strengths and limitations of this study

- This study is among the few studies on the long-term impact of infant and child mortality in the disaster-affected zone in Japan with integrated way using GIS (Geographic Information System). We clarified the damages of natural disasters on the patterns of potential influences of poor child healthcare in the disaster-affected zone.
- We employed longitudinal study on statistical as well as geological distribution using online data on child mortality differences before and after 2011 and in 2011 by sex, age group, and secondary medical area in the disaster-affected zone (Integrated approach).
- This study is an ecological study using online data, we were not able to assess and identify individual social and economic factors that influence child mortality during the study period.

**Article Focus**

- GEJET significantly affected the mortality rate of the target age. A total of 771 children under 10 years old died in 2011. This mortality rate was 6.4 times higher than before and after 2011.
- In particular, the disaster influence of GEJET on child mortality rates was significantly higher in coastal zones with poor local medical resources for child healthcare; the mortality rate was 12-fold higher in coastal zones than in inland zones.

**Key Messages**

- In Japan, a disaster epidemiology system is urgently needed to establish a disaster pediatrics and perinatal liaison system for the development of an emergency plan specific and unique to its community.
- The results of our study would be helpful to reestablish and improve child health disaster preparedness in Japan.

## INTRODUCTION

1  
2  
3 Natural disasters cause significant socioeconomic damages and large-scale death. Particularly, infants and  
4  
5 children face unique vulnerabilities during and after a natural disaster. On March 11, 2011, the Great East  
6  
7 Japan Earthquake and Tsunami (GEJET) struck northeastern Japan, and the tsunami that followed thereafter  
8  
9 caused massive damage and a high death rate, particularly children in coastal zones due to several reasons,  
10  
11 including drowning. In this year, the death rate of children under 10 years old in these affected areas  
12  
13 increased by 0.4-fold<sup>1</sup>. Given this demographic profile, the influence of natural disasters on mortality,  
14  
15 particularly on infants and children, is not well understood.  
16  
17  
18  
19  
20  
21  
22

23 These affected areas had poorer medical resources compared to other areas in Japan. The emergency  
24  
25 medical response capacity was also low. The disaster significantly crippled the medical resources and  
26  
27 healthcare services for infants and children. Hurricane Katrina and the Southern California wildfires  
28  
29 reinforced the need to provide pediatric-specific guidelines to medical personnel responding to disasters in  
30  
31 both hospital and pre-hospital settings<sup>2,3,4</sup>. As of 2011, the lack of regional disaster medical management  
32  
33 plan in Japan resulted in the difficulty in responding to the healthcare needs of children at risk. Disaster  
34  
35 medical assistance teams (DMAT), which was launched in 2005 were not able to respond to expectant or  
36  
37 nursing mothers and children due to the lack of an information sharing system and network with local  
38  
39 hospitals, clinics, and emergency-response organizations<sup>5,6,7</sup>. Based on the lessons learned from the absence  
40  
41 of liaison between DMAT and local medical care organizations, setting a liaison system for pediatric and  
42  
43 perinatal medical care during disasters was demanded in 2016. In establishing the liaison system, however,  
44  
45 only few prior studies determined the influence of disaster on child mortality and examined the association  
46  
47 of between areas with poor medical resources and how to manage preventable child death<sup>8,9</sup>.  
48  
49  
50  
51  
52  
53  
54  
55  
56  
57  
58  
59  
60

1 In this paper, we investigated the dynamics of infant and child mortality (age, 0–9 years.) in northeastern  
2  
3 Japan before and after 2011. Our study aimed to examine associations between the different characteristics  
4  
5 of medical care, including the preparedness of ob-gyn, pediatricians and public health nurses (PHN), and the  
6  
7 geological distribution of hospitals/clinics. In addition, we also determined the influence of changes in  
8  
9 normal and emergency conditions on infant and child mortality. Empirical evidence on these different  
10  
11 aspects of large population-based ecological time series regarding infant and child mortality can contribute  
12  
13 to the establishment of a local liaison system for pediatric and perinatal medical care during disasters.  
14  
15  
16  
17  
18  
19  
20  
21  
22

## 23 **METHODS**

### 24 **Study population**

25  
26 Due to the influence of geographic and social traits on patterns of inundation and casualties, we compared  
27  
28 data from Iwate, Miyagi, and Fukushima. These regions share a common trait, namely, a deeply indented  
29  
30 coastline with narrow flatlands bordered by sea and mountains, which increases their vulnerability to  
31  
32 tsunami damage. The total number of clustered SMA was 20 (Figure 1). From 2008 to 2014, according to  
33  
34 the DWH database, the total number of deaths of children aged 0–9 years in Iwate, Fukushima, and Miyagi  
35  
36 was 1 748 (0–4 years: 1 345; 5–9 years: 403). In 2011, the total number of deaths for children aged 0–9  
37  
38 years was 717 in three prefectures (Iwate: 168; Miyagi, 452; and Fukushima: 97).  
39  
40  
41  
42  
43  
44  
45  
46  
47  
48  
49  
50

51 **\*Figure 1.** Map of the study area\*  
52  
53  
54  
55  
56

### 57 **Study site**



1 Regarding medical resources, we mapped the location of DBH in Figure 2, including CDMH and LDMC  
2  
3 and added data from other medical facilities, such as PMC, pediatric clinics, and Ob-Gyn clinics in Figure  
4  
5  
6 2-a. We also gave 10 km margin from each DBH and observed the covering range of those medical facilities  
7  
8  
9 in Figure 2-b. Most SMA had DBH except Iwate-chubu and Soso area. Meanwhile, the coastal zones in  
10  
11  
12 Iwate, Kuji, Miyako, Kamaishi, and Kesen also had DBH. Most of these DBH combined PMC function but  
13  
14  
15 had few pediatrics. Most pediatrics were distributed out of the 10 km margin in Iwate. As for Miyagi, most  
16  
17  
18 DBH are centralized in inland zone and Sendai, which is the prefectural capital in Miyagi.  
19

20 As of 2014, the numbers of full time doctors and clinic were as follows: pediatric clinics, 824 (Iwate:  
21  
22 290, Miyagi: 404, Fukushima: 497); pediatricians, 1191 (Iwate: 290, Miyagi: 404, Fukushima: 497);  
23  
24  
25 Ob-Gyn clinics, 216 (Iwate: 81, Miyagi: 49, Fukushima: 88), Ob-Gyn doctors, 332 (Iwate: 124, Miyagi: 62,  
26  
27  
28 Fukushima: 146). Regarding PMC, Iwate and Miyagi had 10 each, and Fukushima had 5. Meanwhile, in  
29  
30  
31 terms of disaster medical facilities, Iwate had 11 DBH (2 CDMH and 9 LDMC); Miyagi had 13 DBH (1  
32  
33  
34 CDMH and 12 LDMC), and Fukushima had 8 DBH (1 CDMH and 7 LDMC). As for Fukushima, Soso did  
35  
36  
37 not have a DBH, as shown in Figure 2. While each DBH was located in inland areas in each SMA except  
38  
39  
40 Iwaki, in coastal zone, pediatrics was located along the coast and was not covered in the 10-km margin of  
41  
42  
43 the DBH. Iwaki had a DBH and centralized PMCs for neighboring coastal zones.  
44  
45  
46  
47

48 **\*Figure 2.** Location of DBH, including CDMH and LDMC.\*  
49  
50  
51  
52

### 53 **Study design and setting**

54  
55

56 We performed a large population-based ecological study using data from the Statistical Bureau of Japan  
57  
58  
59 (*e-stat*)<sup>10</sup> of the Data Warehouse for Healthcare and Welfare Plan (DWH)<sup>11</sup>. The *e-stat* is an official site for  
60

1 Japanese government statistics. Each database is produced by all ministries in the government. *e-stat* records  
2  
3 ecological data set of several categories, such as prefectures, age group, and sex, to analyze the mortality  
4  
5 rate of a specific area and age group. However, we could not complete the analysis by only using data from  
6  
7 *e-stat*; thus, we used the DWH database, which categorizes more specific factors, such as medical  
8  
9 administration, health center area, and municipal data, such as the number of PHN; death by age, sex, and  
10  
11 year; and categorized medical areas. In Japan, medical administration areas are broadly divided into 3 units:  
12  
13 each municipality is designated as primary medical area, a combination of two municipalities is designated  
14  
15 as secondary medical area (SMA), and a prefecture is designated as tertiary medical area. Under the Medical  
16  
17 Care Act, SMA is defined as the essential unit for health care planning, within which all necessary care shall  
18  
19 be proved. In view of this principle, we used SMA as unit of analysis in our ecological study design to  
20  
21 identify the inequality of medical resources and to determine the influence of available medical resources on  
22  
23 infants and child mortality.  
24  
25  
26  
27  
28  
29  
30  
31  
32  
33

34 Regarding medical resources, our study used the database of Japan Medical Analysis Platform (JMAP)<sup>12</sup>,  
35  
36 Japan Association of Obstetricians and Gynecologists (JAOG)<sup>13</sup>, and Medicare Information Laboratory  
37  
38 (MIL)<sup>14</sup>. JMAP collects medical information and institutional data nationwide. We obtained the number of  
39  
40 medical doctor by detailed categories. JAOG records information from comprehensive/local perinatal  
41  
42 maternal child medical center and perinatal medical centers (PMC). Meanwhile, the MIL of the Ministry of  
43  
44 Health, Labor and Welfare records a list of disaster base hospitals (DBHs), including core disaster medical  
45  
46 hospital (CDMH) and local disaster medical center (LDMC). DBH is a disaster-ready hospital, which has a  
47  
48 function to support local medical institution and accepts the seriously ill serious disabled. DBH is placed as  
49  
50  
51  
52  
53  
54  
55  
56  
57  
58  
59  
60

1 hospital to carry central role on in medical care relief activities at the time of disaster. In principle, each  
2  
3  
4 prefecture should have more than one CDMH, and each SMA should have more than one LDMC.  
5

6 We analyzed data from *e-stat*, DWH, JMAP, JAOG, and MIL in three prefectures, namely, Iwate,  
7  
8 Fukushima, and Miyagi, from 2008 to 2014. We investigated damages and impacts of disasters during a  
9  
10 7-year period, i.e., before GEJET (2008–2010), 2011, and after GEJET (2012–2014). We chose these three  
11  
12 prefectures because they were the most severely affected prefectures in 2011, and more than 99% of all  
13  
14 deaths were in these areas<sup>15</sup>. Integrating data from *e-stat*, DWH, JMAP, JAOG, and MIL enables us to  
15  
16  
17 identify mortality rates by sex, age group, and region.  
18  
19  
20  
21  
22  
23  
24  
25

## 26 **Measurements**

27  
28 We analyzed infant and child mortality rates by sex, age group (0–4 years and 5–9 years), and SMA in Iwate,  
29  
30 Miyagi, and Fukushima. The leading causes of mortality by sex, study span, and SMA were examined for  
31  
32 each age group. To calculate death rates per 100 000 inhabitant children under 10 years of age, official  
33  
34 resident registration data for inhabitants were used. We calculated the age-specific death rate using the  
35  
36 administrative reports of resident registry of municipalities in *e-stat* and DWH as denominators. The specific  
37  
38 causes of death for ages 0–4 years and 5–9 years were ranked up to 5th from 2008 to 2014 in Japan.  
39  
40  
41 Demographic and ecological characteristics were also analyzed to examine the relationship with death  
42  
43 caused by natural disasters. To determine the potential effect of disasters on the different SMA mortality rate,  
44  
45 we analyzed ecological characteristics through the Geographic Information Systems<sup>16</sup>. We mapped the bar  
46  
47  
48 graph of infant and child death. We also mapped the location of medical facilities, such as pediatrics,  
49  
50  
51  
52  
53  
54  
55  
56  
57  
58  
59  
60

1 Ob-Gyn clinics, DBH, and PMC using ArcGIS 10.4<sup>17</sup>. In addition, to determine the DBH coverage of  
2  
3 neighboring medical facilities and clinics, we gave a 10 km margin from each DBH location.  
4  
5  
6  
7  
8

## 9 **Patient and Public involvement**

10  
11 In this study, patients and public were not involved.  
12  
13  
14  
15

## 16 **Statistical analysis**

17  
18 Quantitative variables are presented as means  $\pm$  standard deviation (SD). We conducted multiple regression  
19  
20 analysis for infant and child mortality rate according to each of the classified period (before 2011, during  
21  
22 2011, and after 2011). Regression model analyses was applied for infant and child mortality rates and other  
23  
24 data before GEJET (2008–2010) and after GEJET (2012–2014). To examine the associations between  
25  
26 mortality rate and ecological characteristics, we included 12 variables in the regression models. Dummy  
27  
28 variables were used for sex, age group (0–4 years vs. 5–9 years), location of SMA, location of DBH, and  
29  
30 prefecture. Meanwhile, the continuous variables were the number of DBH, pediatrics, pediatricians per 100  
31  
32 000 population, Ob-Gyn clinics, Ob-Gyn per 100 000 population, and PHN. Statistical significance was  
33  
34 tested at a two-sided significance level of 0.05, and all confidence intervals were reported as two-sided  
35  
36 values with a confidence level of 95%. Statistical analyses were performed with Stata 14.0<sup>18</sup>.  
37  
38  
39  
40  
41  
42  
43  
44  
45  
46  
47  
48  
49  
50

## 51 **Results**

52  
53 Table 1 summarizes the baseline characteristics of medical resources in Iwate, Miyagi, and Fukushima. Data  
54  
55 were expressed as mean  $\pm$  SD. As shown in Table 1, medical resources in Iwate were significantly fewer  
56  
57  
58  
59  
60

than in other prefectures. In particular, the mean number of pediatrics in Iwate was lower than that in other prefectures (Iwate: 12.8, Miyagi: 80.3, and Fukushima: 99.0). As for the number of pediatrics and Ob-Gyn, the national average of pediatricians per 100 000 population was 17.9 and that of Ob-Gyn was 3.94 in 2015.

Compared with this data, those of the study areas were lower than the national average.

**Table 1** Baseline characteristics of medical resources in affected areas in the three prefectures

| Medical Resources                           | Iwate          | Miyagi         | Fukushima    |
|---------------------------------------------|----------------|----------------|--------------|
| <i>Pediatric clinic</i>                     | 12.8<br>(14.3) | 80.3<br>(97.6) | 99.0 (144.6) |
| <i>Pediatricians per 100 000 population</i> | 8.0 (2.5)      | 12.5 (1.6)     | 23.8 (8.9)   |
| <i>Pediatrician</i>                         | 32 (60.4)      | 101<br>(123.9) | 70 (57.5)    |
| <i>PMC</i>                                  | 1.1 (0.9)      | 2.5 (1.7)      | 0.7 (0.8)    |
| <i>Ob-Gyn per 100 000 population</i>        | 2.9 (1.9)      | 2.7 (0.5)      | 3.6 (1.1)    |
| <i>Ob-Gyn clinic</i>                        | 4.9 (5.9)      | 22.0<br>(32.1) | 19.8 (30.1)  |
| <i>Ob-Gyn Dr.</i>                           | 7 (8.6)        | 37 (56.4)      | 17 (18.4)    |
| <i>PHN</i>                                  |                |                |              |
| PHN before 2011                             | N/A            | N/A            | N/A          |
| PHN 2011                                    | 128<br>(55.8)  | 365<br>(92.3)  | 204 (119.3)  |
| PHN after 2011                              | 132<br>(54.6)  | 371<br>(86.1)  | 213 (99.9)   |

*Note:* The value of each medical resource was expressed as mean  $\pm$  SD before 2011 (2008–2010), during 2011, and after 2011 (2012–2014).

The mortality rate per 100 000 population as classified according to the medical care area: SMA is shown in Figure 3. From this figure, mortality late before and after 2011 was only minimally different among the SMA, and the rates were under 100 per 100 000 population. By contrast, the rates were significantly higher

1 in 2011 than in other periods. The mortality rates were higher in coastal zones, such as Ishinomaki-Tome-  
2  
3  
4 Kesenuma (ITK), Kamaishi, Kesen, and Miyako, than those of other SMA in Iwate. In particular, the  
5  
6 mortality rate for children aged 0–4 years in Kamaishi was 1469.5 per 100 000 population, which was the  
7  
8 highest among all 20 MSA.  
9

10  
11  
12  
13 **\* Figure 3. Mortality rate per 100 000 population as classified according to Medical Care area\***  
14

15  
16 Figure 4 shows the influence of SMA location on infant and child mortality by age group, sex, and periods.

17  
18 From this mortality boxplot, we can see that the mortality rate of children under 10 years was significantly  
19  
20 higher than before and after 2011 in coastal zones. Moreover, the mortality rate of children aged 0–4 years  
21  
22 was higher than that of aged 5–9 years. Furthermore, the mortality rates of males were higher than those of  
23  
24 females in coastal zone. Meanwhile, regardless of age, sex, and periods, mortality rates followed similar  
25  
26 pattern in inland zone, in which each mean of mortality rate was not statistically different.  
27  
28  
29  
30  
31  
32

33  
34 **\*Figure 4. Influence of SMA location on infant and child death by age group, sex, and period\***  
35

36  
37 A total of 1 748 deaths of children aged 0–9 years were confirmed in the 20 MSA from 2008 to 2014 in  
38  
39 the affected area. Table 2 summarizes the mortality rate of children under 10, medical resources in target  
40  
41 areas before and after 2011, and in 2011. A total of 1062 infant and child deaths were identified: the mean  
42  
43 death rate before 2011 was 191, the number of death in 2011 was 717, and the mean death rate after 2011  
44  
45 was 152.7. As shown in Table 2, the values present the number or means of mortality rate by individual  
46  
47 attributes (sex, age group, mortality rate per 100 000 population, region, and location of DBH) for infants  
48  
49 and children by period. The results show no significant difference in the proportion of death proportion as  
50  
51 analyzed according to sex from 2008 to 2014. However, the number of male deaths in 2011 was 3.5 times  
52  
53  
54  
55  
56  
57  
58  
59

higher than before 2011 and 4.2 times higher than after 2011. The rate of female deaths was 4.1 times higher than before 2011 and 5.3 times higher than after 2011. As for age group, in each period, the number of death of children aged 0–4 years was higher than that of children aged 5–9 years. Proportion gaps of death were noted between those aged 0–4 years and 5–9 years before and after 2011 (72.8%–74.6%). However, the gaps decreased to 25.2% in 2011. In 2011, the mortality rate in the coastal zone was 11.7 times higher than in the inland zone. Meanwhile, the mortality rate in DBH along coast was 10 times higher than in that not along coast zone.

**Table 2** Population mortality of children under 10 and medical resources in target areas before, after, and in 2011

|                                                        | Before 2011 | 2011        | After 2011 |
|--------------------------------------------------------|-------------|-------------|------------|
|                                                        | 2008–2010   |             | 2012–2014  |
| <i>Sex</i>                                             |             |             |            |
| Male (N=550)                                           | 104 (54.3)  | 361 (50.3)  | 85 (55.9)  |
| Female (N=511)                                         | 88 (45.7)   | 356 (49.7)  | 67 (44.1)  |
| <i>Age group</i>                                       |             |             |            |
| 0–4 years (N=748)                                      | 167 (87.3)  | 449 (62.6)  | 132 (86.4) |
| 5–9 years (N=313)                                      | 24 (12.7)   | 268 (37.4)  | 21 (13.6)  |
| <i>Mortality rate per 100 000 (N=1067)<sup>b</sup></i> |             |             |            |
|                                                        | 39.1±41.2   | 226.7±43.4  | 31.4±39.1  |
| <i>Secondary medical area<sup>b</sup></i>              |             |             |            |
| Coastal (N=795.8)                                      | 41.8±42.3   | 456.5±489.4 | 33.9±34.0  |
| Inland (N=265.9)                                       | 36.8±40.5   | 38.7±44.7   | 29.4±36.5  |
| <i>Location of DBH<sup>b</sup></i>                     |             |             |            |
| Not along the coast (N=175.2)                          | 37.0±41.5   | 54.9±70.6   | 27.0±34.0  |
| Along the coast (N=886.5)                              | 42.9±40.7   | 545.7±519.6 | 39.5±35.2  |

**Note:** Values are shown as n (%) or mean±SD. <sup>b</sup> Each mean of values presents factors potentially affecting the mortality rate, and variables were analyzed using student t test with significance at the 5%. All values were statistically significant at 5%.

**\*Figure 5.** Death distribution of children aged 0–9 years in affected areas in 2011 by SMA.\*

1 Figure 5 presents the death distribution of children aged 0–9 in affected areas before, after, and in 2011 by  
2  
3 SMA. In Figure 5-a, the number of death in Sendai was the highest, and 49 infants were dead in 2011  
4  
5 (males: 21, females: 28). ITK had 25 deaths in 2011. As the tangency, the number of male deaths was higher  
6  
7 than females, and the mortality rate is remarkably high along the coastal zones, particularly in 2011. In  
8  
9 Figure 5-b, as for children age of 1–4 years, the number of deaths before and after 2011 was lower than that  
10  
11 in 2011. Among children aged 1–4 years, the number of death in ITK was the highest at 123 (42.8%) out of  
12  
13 the total 237 deaths in 2011. In particular, 45 (36.6%) out of the 123 children who died were 3-years old. In  
14  
15 Figure 5-c, as for children aged 5–9 years, 268 died 2011. Similar to the death rate of those aged 1–4 years,  
16  
17 child mortality for those aged 5–9 years was also the highest in ITK at 145 (54.1%) in 2011.  
18  
19  
20  
21  
22  
23  
24  
25

26 The top 5 caused of child mortality for those aged 0–9 years from 2008 to 2014 are shown in Table 3.  
27  
28 Before and after 2011, congenital deformities were the primary cause of death for those aged 0 years in  
29  
30 Japan (mortality rate = 81.3). the accidental death was ranked 5th before 2011, but it ranked 3rd in 2011  
31  
32 (mortality rate = 18.7). For children aged 1–4 years, congenital deformities were also the primary cause of  
33  
34 death except in 2008 and 2011 (mean mortality rate = 3.8). The mean value of accidental death was 3.8 in  
35  
36 2008 and 9.1 in 2011. Meanwhile, the accidental death was the primary cause of death for children aged 5–9  
37  
38 years from 2008 to 2013. The mortality rate from natural disasters in 2011 was 3 times higher than that in  
39  
40 other periods.  
41  
42  
43  
44  
45  
46  
47  
48

49 Sex, age group, location of SMA, prefecture, DBH, and the number of pediatrics per 100 000 population,  
50  
51 pediatricians, Ob-Gyn, Ob-Gyn per 100 000 population, Ob-gyn Dr., and PHN were tested for their  
52  
53 association with infant and child mortality in the 20 MSA (Table 4). In this analysis, no significant  
54  
55 differences ( $p>0.05$ ) in the mortality rate in terms of sex were noted before and after 2011. By contrast,  
56  
57  
58  
59



1 significant differences were noted in childhood mortality as assessed according to age group. The mortality  
2  
3  
4 rate of children aged 0–4 years was higher than those aged 5–9 years before, after, and in 2011 ( $p<0.01$ ). In  
5  
6 2011, mortality rate was positively associated with location of DBH, the number of DBH, and the number of  
7  
8 PHN in the 20 SMA, indicating that in 2011, the occurrence of natural disaster and medical resources were  
9  
10 associated with increased infant and child mortality rate. By contrast, mortality rate was negatively  
11  
12 associated with the number of Ob-Gyn in 2011, indicating that the number of Ob-Gyn was associated with  
13  
14 decreased infant mortality rate ( $\beta = -189.9$ ,  $p=0.02$ ).  
15  
16  
17  
18  
19  
20  
21  
22  
23  
24  
25  
26  
27  
28  
29  
30  
31  
32  
33  
34  
35  
36  
37  
38  
39  
40  
41  
42  
43  
44  
45  
46  
47  
48  
49  
50  
51  
52  
53  
54  
55  
56  
57  
58  
59  
60

**Table 3** Causes of death and the mortality rate per 100 000 population for children aged under 10 years

| Age     | Rank | Before 2011                 |      |                             |      |                             |      | After 2011                  |      |                             |      |                                         |      |                             |      |
|---------|------|-----------------------------|------|-----------------------------|------|-----------------------------|------|-----------------------------|------|-----------------------------|------|-----------------------------------------|------|-----------------------------|------|
|         |      | 2008                        |      | 2009                        |      | 2010                        |      | 2011                        |      | 2012                        |      | 2013                                    |      | 2014                        |      |
|         |      | COD                         | MR   | COD                                     | MR   | COD                         | MR   |
| 0year   | 1    | Congenital<br>deformities   | 91.5 | Congenital<br>deformities   | 83.8 | Congenital<br>deformities   | 85.4 | Congenital<br>deformities   | 81.9 | Congenital<br>deformities   | 77.8 | Congenital<br>deformities               | 78.4 | Congenital<br>deformities   | 70.4 |
|         | 2    | Respiration<br>Disorders    | 34.6 | Respiration<br>Disorders    | 33.7 | Respiration<br>Disorders    | 34.1 | Respiration<br>Disorders    | 30.5 | Respiration<br>Disorders    | 30.2 | Respiration<br>Disorders                | 29.9 | Respiration<br>Disorders    | 24.6 |
|         | 3    | SIDS                        | 14.1 | SIDS                        | 13.5 | SIDS                        | 13.1 | accidental<br>death         | 18.7 | SIDS                        | 13.6 | SIDS                                    | 11.8 | SIDS                        | 0.2  |
|         | 4    | <b>Accidental<br/>death</b> | 13.0 | <b>Accidental<br/>death</b> | 11.4 | <b>Accidental<br/>death</b> | 10.5 | SIDS                        | 12.3 | <b>Accidental<br/>death</b> | 9.0  | <b>Accidental<br/>death</b>             | 8.6  | Haemorrhagic<br>Diseases    | 0.3  |
|         | 5    | Haemorrhagic<br>Diseases    | 11.7 | Haemorrhagic<br>Diseases    | 9.3  | Haemorrhagic<br>Diseases    | 7.9  | Haemorrhagic<br>Diseases    | 8.1  | Haemorrhagic<br>Diseases    | 7.8  | Haemorrhagic<br>Diseases                | 7.4  | <b>Accidental<br/>death</b> | 7.9  |
| 1-4year | 1    | <b>Accidental<br/>death</b> | 3.8  | Congenital<br>deformities   | 3.8  | Congenital<br>deformities   | 3.8  | <b>Accidental<br/>death</b> | 9.1  | Congenital<br>deformities   | 4.2  | Congenital<br>deformities               | 3.4  | Congenital<br>deformities   | 3.8  |
|         | 2    | Congenital<br>deformities   | 3.8  | <b>Accidental<br/>death</b> | 3.5  | <b>Accidental<br/>death</b> | 3.5  | Congenital<br>deformities   | 3.9  | <b>Accidental<br/>death</b> | 2.9  | <b>Accidental<br/>death</b>             | 2.6  | <b>Accidental<br/>death</b> | 2.6  |
|         | 3    | Cancer                      | 2.2  | Cancer                      | 2.0  | Cancer                      | 2.0  | Cancer                      | 1.9  | Cancer                      | 2.4  | Cancer                                  | 2.0  | Cancer                      | 1.6  |
|         | 4    | Pneumonia                   | 1.3  | Heart<br>Diseases           | 1.5  | Pneumonia                   | 1.7  | Pneumonia                   | 1.8  | Heart<br>Diseases           | 1.4  | Heart<br>Diseases                       | 1.3  | Heart<br>Diseases           | 1.2  |
|         | 5    | Heart<br>Diseases           | 1.2  | Heart<br>Diseases           | 1.0  | Heart<br>Diseases           | 1.3  | Heart<br>Diseases           | 1.4  | Pneumonia                   | 1.1  | Pneumonia                               | 1.3  | Pneumonia                   | 1.2  |
| 5-9year | 1    | <b>Accidental<br/>death</b> | 2.2  | <b>Accidental<br/>death</b> | 2.2  | <b>Accidental<br/>death</b> | 2.3  | <b>Accidental<br/>death</b> | 6.5  | <b>Accidental<br/>death</b> | 1.9  | <b>Accidental<br/>death</b>             | 2.0  | Cancer                      | 1.9  |
|         | 2    | Cancer                      | 1.8  | Cancer                      | 1.8  | Congenital<br>deformities   | 1.9  | Cancer                      | 1.8  | Cancer                      | 1.6  | Cancer                                  | 2.0  | <b>Accidental<br/>death</b> | 1.7  |
|         | 3    | Other<br>Cancers            | 0.7  | Heart<br>Diseases           | 0.7  | Cancer                      | 0.5  | Other<br>Cancers            | 0.7  | Congenital<br>deformities   | 0.7  | Other<br>Cancers                        | 0.7  | Congenital<br>deformities   | 0.6  |
|         | 4    | Heart<br>Diseases           | 0.6  | Other<br>Cancers            | 0.6  | Pneumonia                   | 0.5  | Congenital<br>deformities   | 0.6  | Other<br>Cancers            | 0.6  | Heart<br>Diseases                       | 0.4  | Heart<br>Diseases           | 0.5  |
|         | 5    | Congenital<br>deformities   | 0.6  | Congenital<br>deformities   | 0.6  | Heart<br>Diseases           | 0.4  | Heart<br>Diseases           | 0.5  | Pneumonia                   | 0.5  | Pneumonia/<br>Congenital<br>deformities | 0.4  | Pneumonia                   | 0.5  |

**Note:** COD, cause of death; MR, mortality rate per 100 000 population.

**Table 4** Factors affecting infant and child mortality during the study period

| Factors                                  | 2008–2010            |             |          | 2011                    |             |          | 2012–2014           |             |          |
|------------------------------------------|----------------------|-------------|----------|-------------------------|-------------|----------|---------------------|-------------|----------|
|                                          | $\beta$              | <i>s.e.</i> | <i>p</i> | $\beta$                 | <i>s.e.</i> | <i>p</i> | $\beta$             | <i>s.e.</i> | <i>p</i> |
| Intercept                                | 22.2 (-25.0, 69.4)   | 23.6        | (0.35)   | -196.8 (-651.9, 258.3)  | 227.7       | (0.90)   | -18.9 (-62.8, 25.1) | 22          | (0.39)   |
| <b>Sex</b>                               |                      |             |          |                         |             |          |                     |             |          |
| Male                                     | -0.4 (-12.7, 11.9)   | 6.2         | (0.95)   | -42.6 (-161.2, 76.0)    | 59.3        | (0.48)   | 7.7 (-3.7, 19.2)    | 5.7         | (0.18)   |
| Female                                   | Ref. group           |             |          | Ref. group              |             |          | Ref. group          |             |          |
| <b>Age group</b>                         |                      |             |          |                         |             |          |                     |             |          |
| 0–4 years                                | 74.8* (62.4, 87.2)   | 6.2         | <0.001   | 164.2* (45.1, 283.4)    | 59.6        | (0.01)   | 49.7* (38.2, 61.3)  | 5.8         | <0.001   |
| 5–9 years                                | Ref. group           |             |          | Ref. group              |             |          | Ref. group          |             |          |
| <b>Location of DBH</b>                   |                      |             |          |                         |             |          |                     |             |          |
| Inland                                   | Ref. group           |             |          | Ref. group              |             |          | Ref. group          |             |          |
| Coastal                                  | 15 (-7.2, 37.3)      | 11.1        | (0.18)   | 91.1 (-123.3, 305.4)    | 107.2       | (0.39)   | -15.1 (-35.8, 5.6)  | 10.4        | (0.15)   |
| <b>Location of DBH</b>                   |                      |             |          |                         |             |          |                     |             |          |
| Not along the coast                      | Ref. group           |             |          | Ref. group              |             |          | Ref. group          |             |          |
| Along the coast                          | -11.4 (-44.6, 21.9)  | 16.6        | (0.49)   | 370.8* (50.4, 691.1)    | 160.2       | (0.02)   | 19.2 (-11.7, 50.2)  | 15.5        | (0.22)   |
| <b>Prefecture</b>                        |                      |             |          |                         |             |          |                     |             |          |
| Iwate                                    | -16.9 (-56.5, 22.6)  | 19.8        | (0.39)   | 245.7 (-135.2, 626.6)   | 190.6       | (0.20)   | 13.3 (-23.5, 50.1)  | 18.4        | (0.47)   |
| Miyagi                                   | -31.9* (-63.4, -0.6) | 15.8        | (0.05)   | -195.4 (-497.8, 107.1)  | 151.3       | (0.20)   | -12.7 (-41.9, 16.5) | 14.7        | (0.39)   |
| Fukushima                                | Ref. group           |             |          | Ref. group              |             |          | Ref. group          |             |          |
| <b>Pediatrics per 100 000 population</b> |                      |             |          |                         |             |          |                     |             |          |
| <b>Pediatrician</b>                      | 0.0 (-0.2, 0.2)      | 0.1         | (0.09)   | -0.3 (-2.0, 1.5)        | 0.9         | (0.76)   | 0.0 (-0.2, 0.2)     | 0.01        | (0.84)   |
| <b>Ob-Gyn</b>                            | 12.3 (-4.6, 29.2)    | 8.5         | (0.15)   | -189.9* (-352.9, -26.8) | 81.6        | (0.02)   | 0.9 (-16.7, 14.8)   | 0.06        | (0.49)   |
| <b>Ob-Gyn per 100 000 population</b>     |                      |             |          |                         |             |          |                     |             |          |
| <b>Ob-Gyn Dr.</b>                        | 0.4 (-8.5, 9.4)      | 4.5         | (0.92)   | -64.2 (-150.3, 21.9)    | 43.1        | (0.14)   | 5.0 (-13.3, 3.3)    | 4.20        | (0.23)   |
| <b>PHN</b>                               | -0.5 (-1.2, 0.2)     | 0.4         | (0.17)   | -2.1 (-9.1, 5.0)        | 3.5         | (0.56)   | -0.1 (-0.8, 0.5)    | 0.30        | (0.69)   |
| <b>PHN</b>                               | -                    | -           | -        | -1.7* (0.4, 2.9)        | 0.6         | (0.01)   | 0.0 (-0.1, 0.2)     | -0.10       | (0.49)   |

**Note:** DBH; disaster base hospital. PHN; public health. nurse; *s.e.*, standard error. \**p*<0.05.

## DISCUSSIONS

This study revealed mortality differences before, after, and in 2011 by sex, age group, and SMA. Several studies reported that the medical resources in a prefecture impact the rate of childhood mortality, particularly in Iwate that has poor medical service system; as such, amending the evaluation standards of existing medical centers is needed<sup>19,20</sup>. Iwate needs to support the recovery of children and their caregivers during and after the March 2011 GEJET. Another previous study reported that medical facilities are forced to

1 integrate or discontinue due to a declining population. The policy to control the medical  
2  
3 expense due to the worsening of fiscal conditions, the loss of medical liaison between medical  
4  
5 education institutions and regional/rural hospitals were also associated with imbalanced  
6  
7 medical resource allocation<sup>19</sup>. The results of this analysis indicate the needs for improving accessibility  
8  
9 of local medical facilities, simulating a transportation scenario during emergency situations, and  
10  
11 pre-assigning residents to local hospitals during emergencies<sup>21</sup>. However, the previous studies did not focus  
12  
13 on the ecological spatial influence on infant and child death. Access to medical care for infant and child can  
14  
15 be improved by establishing a liaison system with local child care system to compensate for the potential  
16  
17 lack of healthcare resources. Our study considered spatial or geographic characteristics by scattering DBH,  
18  
19 PMC, pediatrics, and Ob-Gyn location. We found uneven distribution of doctors and healthcare facilities for  
20  
21 infants and children in affected areas. Most DBH in Miyagi were concentrated in the metropolitan city,  
22  
23 while several DBH in Iwate were located along the coast. Some local pediatrics were not covered by DBH.  
24  
25 In Fukushima, Soso has no DBH and Ob-Gyn centered in Iwaki, where the incidence of radiation-related  
26  
27 cancer in children has increased due to the meltdowns at the Fukushima Daiichi Nuclear Power Plant. A  
28  
29 Child Care Emergency Preparedness Toolbox by GSA<sup>22</sup> details how to deal with child care and support  
30  
31 liaison system. However, Japan has not established an official Child Care Emergency Disaster Plan yet,  
32  
33 although an information service for Infants and Perinatal Disaster Liaison is currently studied. Few studies  
34  
35 focused on the effect of employing PHNs to mitigate child health risk. However, we found that an adequate  
36  
37 number of PHNs would reduce infant and child mortality rates ( $\beta = -1.7$ ,  $p = 0.01$  in 2011), and the number  
38  
39 of Ob-Gyn was negatively associated with mortality rate ( $\beta = -189.9$ ,  $p = 0.02$ ) in 2011. To address the uneven  
40  
41 distribution of medical resource, the core disaster medical facilities and local healthcare centers should be  
42  
43  
44  
45  
46  
47  
48  
49  
50  
51  
52  
53  
54  
55  
56  
57  
58  
59

strengthened for infant and child care and an adequate number of PHNs should be provided in and out of the medical care area. To establish the liaison system, the numerous issues faced by disaster-affected individuals should be comprehensively addressed, and management should include enhancing the support structure, schemes to form communities, reconstruction of the disaster-affected areas, support for children, and a system for sharing of information among healthcare infrastructures.

Water-related disasters often increase the risk of infant and child death. According to the World Health Organization, prematurity is the primary cause of death for neonates (16%), while pneumonia is the primary cause of death for children aged 1–59 months (13%)<sup>23, 24</sup>. By contrast, the primary cause of death in these age groups differs worldwide. We found that the primary cause of death for children under 5 years old was congenital deformities. Accidental death is ranked among the top 4 causes of mortality for children below 5 years, while it ranked as the 1st cause of mortality for children aged 5–9 years from 2008 to 2013 in Japan. In 2011, the rank of accidental death as a cause of mortality moved up or remained for children aged 0–9 years, which might be attributed to the impact of drowning, hypothermia, and decondition as a cause of mortality during GEJET. In general, these results show that children under 10 years of age were exposed to accidents in Japan, and the risk of death is increased during disasters.

Previous studies have indicated evidence on the relationship of mortality from tsunami and other factors in local areas. For instance, the study on the 2004 tsunami in Indonesia indicated the effects of mortality on subsequent fertility among residents and caused widespread shock among residents<sup>25,26,27</sup>. Meanwhile, 1.7 million children are among the 4.4 million people displaced due to typhoon Haiyan in the Philippines, and the death toll stands at more than 4 000<sup>28</sup>. Age-specific mortality tended to increase with age. A previous study showed that the mortality rate among children aged 0 to 4 years was

1 higher than those aged 5 to 14 years in specific parts of Iwate, northern Miyagi, and south Fukushima from  
2  
3 March to November 2011<sup>9</sup>. Our study showed the same tangency, and the age difference significantly  
4  
5 influenced mortality rate. However, our study focused on lower-aged children and investigated all medical  
6  
7 care areas in the three prefectures and compared the influence of DBH located in inland and coastal zones on  
8  
9 childhood mortality before, after, and in 2011. We found that the mortality rate of children aged 0–9 years  
10  
11 was lower in coastal zones than that in ocean zone in 2011. Collectively, the results of our study and those of  
12  
13 previous studies suggest that the GEJET significantly affected the rate of childhood mortality before and  
14  
15 after its occurrence.  
16  
17  
18  
19  
20  
21  
22  
23  
24

## 25 **Principal findings**

26  
27 We observed significant healthcare disparities by region remained significant associated with infant death. A  
28  
29 total of 7 out of the 32 DBH located in the coastal zones were related to the risk of infant and child death in  
30  
31 2011: In coastal zones, the rate of child death was higher than that in inland zone. From 2008 to 2012, the  
32  
33 accidental death belonged to the top 5 causes of death for children aged 0–9 years. This result indicated that  
34  
35 infants and children are exposed to accidents regardless of disaster outbreaks. In 2011, we found that  
36  
37 mortality rate in the coastal zone was 10 times higher.in the inland zone. The mortality rate in 2011  
38  
39 increased 11-fold compared to before and after 2011 when no tsunami occurred. Furthermore, the mortality  
40  
41 rate of children under 5 years old was 164.2 times higher than that of children under 10 years old in 2011.  
42  
43  
44  
45  
46  
47  
48  
49  
50

## 51 **Accuracy of case, exposure, and outcome identification**

52  
53 Our study analyzed ecological data collected from the databases of *e-stat*, DWH, JMAP, and MIL which are  
54  
55 widely used databases in Japan. However, misclassification of the data is possible, and the definition of the  
56  
57  
58  
59

1 point where and how to count the number of migrants and immigrants is uncertain. Regarding general  
2  
3  
4 practitioners, pediatricians, and Ob-Gyn, we applied data only registered in JMAP. Data for mortality rate  
5  
6 was calculated via the Residential Basic Book in SMA. As such, some infant and child data may be missing.  
7  
8  
9 However, these data are official reports from the Japanese government. Thus, the validity of our calculated  
10  
11  
12 data is guaranteed.  
13  
14  
15

### 16 17 **Study limitations**

18  
19  
20 Our study has several limitations. First, for 2008–2010 and 2012–2014, the mean data of each three year was  
21  
22 applied for analysis. As such, some inconsistencies may be present from the real data of each year.  
23  
24  
25 Nevertheless, the period analyzed in the current study appears to be long enough to identify causes of death  
26  
27 and determine the ecological characteristics related to the mortality of children under 10 years old. The  
28  
29 changing trends in human casualties caused by northeastern disasters indicated that ecological factors are  
30  
31 associated with childhood mortality. Second, the study failed to include individual social and economic  
32  
33 factors related to deaths by natural disasters. Vulnerability, such as the effects of natural disasters on health,  
34  
35 depends on personal characteristics, including location of residence, age, income, education, and disability,  
36  
37 and economic factors, including socio-economic status of parents and the budget of the healthcare facilities  
38  
39 in each SMA) in danger<sup>29,30</sup>. Our study did not consider these factors during analysis due to the limitations  
40  
41 of population-based ecological data. The limitation, however, applies to most previous studies that assessed  
42  
43 the effects of for children under 10 years old using ecological data.  
44  
45  
46  
47  
48  
49  
50  
51  
52  
53  
54

### 55 **Abbreviations**

56  
57 GEJET: Great East Japan Earthquake and Tsunami; SMA: Secondary Medical Area; DMAT: Disaster  
58  
59 Medical Assistance Teams; DWH: Data Warehouse for Healthcare and Welfare Plan; JMAP: Japan Medical

1 Analysis Platform; JAOG: Japan Association of Obstetricians and Gynecologists; MIL: Medicare  
2 Information Laboratory; DBH: Disaster Base Hospital; CDMH: Core Disaster Medical Hospital; LDMC:  
3 Local Disaster Medical Center; PMC: Perinatal medical center; Ob-Gyn: Obstetricians and Gynecologists;  
4 PHN: Public Health Nurse; ITK: Ishinomaki-Tome- Kesenuma; SD: Standard deviation; *s.e.*: Standard  
5 error; COD: Cases of death; MR: Mortality rate; N/A: Not applicable.  
6  
7  
8  
9

## 10 **DECLARATIONS**

### 11 **Ethics approval and consent to participate**

12 Not applicable.

### 13 **Consent for publication**

14 Not applicable.

### 15 **Competing interests**

16 The authors declare that they have no competing interests.

### 17 **Authors' contributions**

18 AT designed the study and methodology, conducted the analysis, and drafted the manuscript. KS, HY  
19 assisted in manuscript preparation, and revised the draft. EO provided data sources, study materials, and  
20 revised the manuscript. All authors read and approved the final manuscript.  
21

### 22 **Provenance and peer review**

23 Not commissioned; externally peer reviewed

### 24 **Data sharing statement**

25 No additional data available.  
26  
27  
28  
29  
30  
31  
32  
33  
34  
35  
36  
37  
38  
39  
40  
41  
42  
43  
44  
45  
46  
47  
48  
49  
50  
51  
52  
53  
54  
55  
56  
57  
58  
59  
60



**Funding**

This work was supported by JSPS KAKENHI Grant Number 17K12623 and Japan Agency for Medical Research and Development, “Personal Health Record (PHR) Research Project, PHR 331 Model for Supporting Pregnancy, Delivery, and Childbearing” (FY 2016-2018); Grant No. 160110001j0101.

For peer review only

## REFERENCES

1. White paper on disaster management 2011. Cabinet Office, government of Japan  
<http://www.bousai.go.jp/kaigirep/hakusho/h23/bousai2011/html/honbun/index.htm> (in Japanese)  
Accessed 8 Sep., 2017.
2. Nelson S, Luten J, Jones K, et al. Mortality associated with Hurricane Katrina-Florida and Alabama, August-October 2005. *MMWR Morb Mortal Wkly Rep* 2006;55:239–42.
3. Jonkman SN, Maaskant B, Boyd E, et al. Loss of life caused by the flooding of New Orleans after Hurricane Katrina: analysis of the relationship between flood characteristics and mortality. *Risk Anal* 2009;29:676–98.
4. American red cross, American Red Cross & Public Health: The Response to Hurricane Katrina and Beyond, Report to ARC Disaster Health Services, March, 2006 Operation DR # 865 Working Group on the American Red Cross Public Health Response to Hurricane Katrina: The Harvard Humanitarian Initiative of Harvard School of Public Health. The John Hopkins Bloomberg School of Public Health.
5. Ushizawa H, Foxwell AR, Bice S, et al. Needs for disaster medicine: lessons from the field of the Great East Japan Earthquake. *Western Pac Surveill Response J* 2012;4(1):51–5. doi:10.5365/wpsar.2012.3.4.010.
6. Iwata O, Kawase A, Iwai M, et al. Evacuation of a Tertiary Neonatal Centre: Lessons from the 2016 Kumamoto Earthquakes. *Neonatology* 2017;112(1):92–6. doi: 10.1159/000466681. Epub 2017 Apr 25.
7. Osofsky J, Osofsky H. Lessons learned about the impact of disasters on children and families and post-disaster recovery *Child and Family Advocacy* 2013:91–105.
8. Datar A, Liu J, Linnemayr S, et al. The impact of natural disasters on child health and investments in rural India. *Soc Sci Med* 2013;76(1):83–91. doi:10.1016/j.socscimed.2012.10.008.
9. Shinji N, Masao I. Mortality in the 2011 Tsunami in Japan. *J Epidemiol* 2013;23(1):70–3. doi:10.2188/jea.JE20120114.
10. *e-stat*, portal site of official statistics of Japan, <http://www.e-stat.go.jp/SG1/estat/eStatTopPortalE.do>. (in Japanese) Accessed 1 Sep., 2017.
11. Data Warehouse for Healthcare and Welfare Plan, <http://jmedicine.com/> (in Japanese) Accessed 21 Aug. 2017.
12. Japan Medical Analysis Platform, <http://jmap.jp/pages/guide>. Accessed 1 Sep., 2017. (in Japanese) Accessed 21 Aug. 2017.
13. Japan association of Obstetricians and Gynecologists, <http://www.jaog.or.jp/>. (in Japanese) Accessed 21 Aug., 2017.
14. The list of disaster-ready hospitals, [http://www.mhlw.go.jp/seisakunitsuite/bunya/kenkou\\_iryou/iryou/saigai\\_iryou/dl/saigai\\_iryou07.pdf](http://www.mhlw.go.jp/seisakunitsuite/bunya/kenkou_iryou/iryou/saigai_iryou/dl/saigai_iryou07.pdf). Accessed 1 Sep., 2017. (in Japanese). Accessed 21 Aug. 2017.
15. Emergency Disaster Countermeasures Headquarters, the National Police Agency. Damage situation and police countermeasures associated with 2011 Tohoku district — off the Pacific Ocean Earthquake. The National Police Agency. 2011. <https://www.npa.go.jp/archive/keibi/syouten/syouten281/pdf/ALL.pdf> (in Japanese) Accessed 21 Aug. 2017.
16. Kang-Tsung Chang, The International Encyclopedia of Geography, Geographic Information System. AAG, Mar 2017. DOI: 10.1002/9781118786352.wbieg0152.
17. esri, <https://www.esri.com/en-us/home>. Accessed 21 Aug. 2017.
18. STATA, <https://www.stata.com/stata14/>, Accessed 21 Aug. 2017.

19. Eiji S, Toshiro K. Establishing medical care area from residents perspectives: The accessibility of critical care in Kanagawa Prefecture and Iwate Prefecture as case studies. *Journal of the National Institute of Public Health* 2013; 62(1):46–51.
20. Masami I, Takashi N, Masami I. Emergency Medicine in Japan, JMA Policies. *Japan Med Assoc J* 2009;52(4): 211–13.
21. Sanuki R, Satoh E, Kumakawa T, et al. Accessibility to medical care in case of major disasters. *Journal of the National Institute of Public Health* 2013;(62):52–61.
22. GSA Public Buildings Service Child Care Division, Child Care Emergency Preparedness Toolbox, 2011. [https://www.gsa.gov/graphics/pbs/Child\\_Care\\_Emergency\\_Preparedness\\_Toolbox.pdf](https://www.gsa.gov/graphics/pbs/Child_Care_Emergency_Preparedness_Toolbox.pdf). (in Japanese) Accessed 21 Aug. 2017.
23. Information service for Infants and Perinatal Disaster Liaison, <http://www.mhlw.go.jp/file/05-Shingikai-10801000-Iseikyoku-Soumuka/0000129283.pdf>. Accessed 21 Aug. 2017.
24. Global Health Observatory (GHO) data, World Health Organization, [http://www.who.int/gho/child\\_health/mortality/causes/en/](http://www.who.int/gho/child_health/mortality/causes/en/). (in Japanese) Accessed 21 Aug. 2017.
25. Davis J. Fertility after natural disaster: Hurricane Mitch in Nicaragua. *Popul Environ.* 2017 Jun;38(4):448-464. doi: 10.1007/s11111-017-0271-5.
26. Cas AG, Frakenberg E, Thomas D. The effects of mortality on fertility: Population dynamics after a natural disaster. *Demography.* 2015 Feb;52(1):15–38. doi:10.1007/s13524-014-0362-1.
27. Cas AG, Frakenberg E, Suriastini W, et al. The impact of parental death on child well-being: Evidence from the Indian Ocean tsunami. *Demography* 2014;51(2):437–57. doi:10.1007/s13524-014-0279-8.
28. Typhoon Haiyan: children in disaster zone are vulnerable, warns Unicef. <https://www.theguardian.com/world/2013/nov/20/typhoon-haiyan-children-vulnerable-unicef>, the guardian, 20 November 2013. (in Japanese) Accessed 21 Aug. 2017.
29. Hyung NM, Jae-Yeon J. Causes of death and demographic characteristics of victims of meteorological disasters in Korea from 1990 to 2008. *Myung and Jang Environmental Health* 2011;10:82. doi: 10.1186/1476-069X-10-82.
30. Mata-Lima H, Alvino-Borba A, Pinheiro A, et al. Impacts of natural disasters on environmental and socio-economic systems: what makes the difference? *Ambient. soc.* vol. 16 no. 3 São Paulo July/Sep.t. 2013 <http://dx.doi.org/10.1590/S1414-753X2013000300004>. (in Japanese) Accessed 21 Aug. 2017.

**\*Figure 1\***

Note: Municipalities severely damaged by the tsunami were included in the analysis and were classified into 3 areas according to their geographic characteristics. The boundary indicates secondary medical area (SMA) in each prefecture. \*

**\*Figure 2\***

Figure 2-a. Location of DBH including CDMH and LDMC. Figure 2-b. Medical facilities. DBH: Disaster Base hospital PMC: Perinatal Medical Center (Central and Local).

**\*Figure 5\***

Figure 5-a. Number of infant death (aged 0 years). Figure 5-b. Number of infant death (aged 0 years). Figure 5-c. Number of infant death (aged 0 years)

1  
2  
3  
4  
5  
6  
7  
8  
9  
10  
11  
12  
13  
14  
15  
16  
17  
18  
19  
20  
21  
22  
23  
24  
25  
26  
27  
28  
29  
30  
31  
32  
33  
34  
35  
36  
37  
38  
39  
40  
41  
42  
43  
44  
45  
46  
47  
48  
49  
50  
51  
52  
53  
54  
55  
56  
57  
58  
59  
60

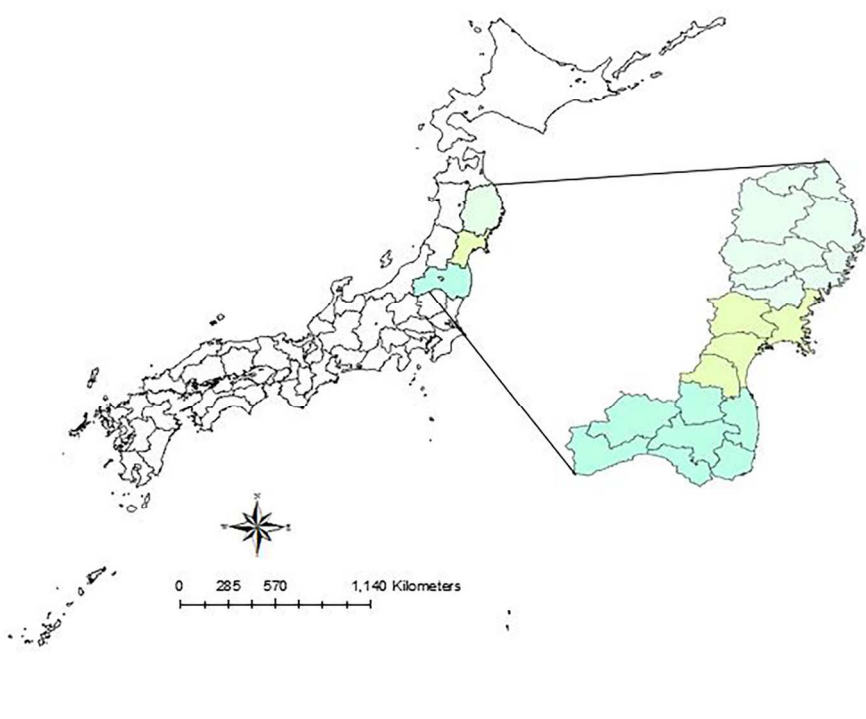

Municipalities severely damaged by the tsunami were included in the analysis and were classified into 3 areas according to their geographic characteristics. The boundary indicates secondary medical area (SMA) in each prefecture.

180x128mm (300 x 300 DPI)

W only

1  
2  
3  
4  
5  
6  
7  
8  
9  
10  
11  
12  
13  
14  
15  
16  
17  
18  
19  
20  
21  
22  
23  
24  
25  
26  
27  
28  
29  
30  
31  
32  
33  
34  
35  
36  
37  
38  
39  
40  
41  
42  
43  
44  
45  
46  
47  
48  
49  
50  
51  
52  
53  
54  
55  
56  
57  
58  
59  
60

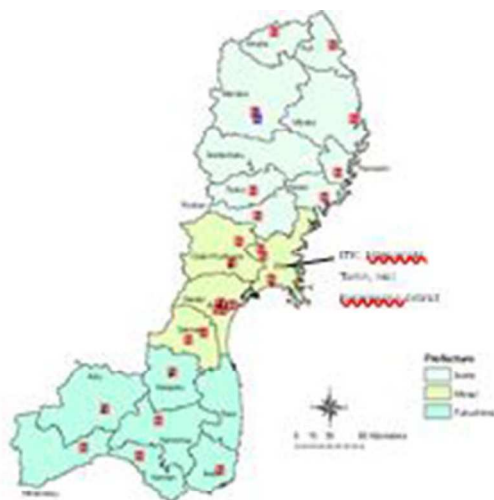

Figure 2-a. Location of DBH including CDMH and LDMC.

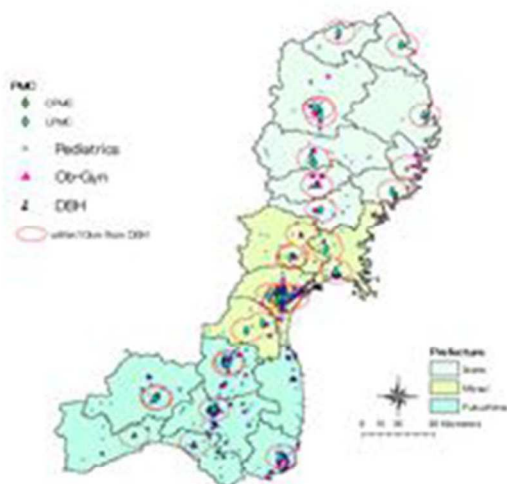

Figure 2-b. Medical facilities, DEH: Disaster Ease hospital  
 PMC: Perinatal Medical Center (Central and Local), pediatrics, and Ob-Gyn.

Figure 2-a. Location of DBH including CDMH and LDMC. Figure 2-b. Medical facilities. DBH: Disaster Base hospital PMC: Perinatal Medical Center (Central and Local).

90x127mm (300 x 300 DPI)

1  
2  
3  
4  
5  
6  
7  
8  
9  
10  
11  
12  
13  
14  
15  
16  
17  
18  
19  
20  
21  
22  
23  
24  
25  
26  
27  
28  
29  
30  
31  
32  
33  
34  
35  
36  
37  
38  
39  
40  
41  
42  
43  
44  
45  
46  
47  
48  
49  
50  
51  
52  
53  
54  
55  
56  
57  
58  
59  
60

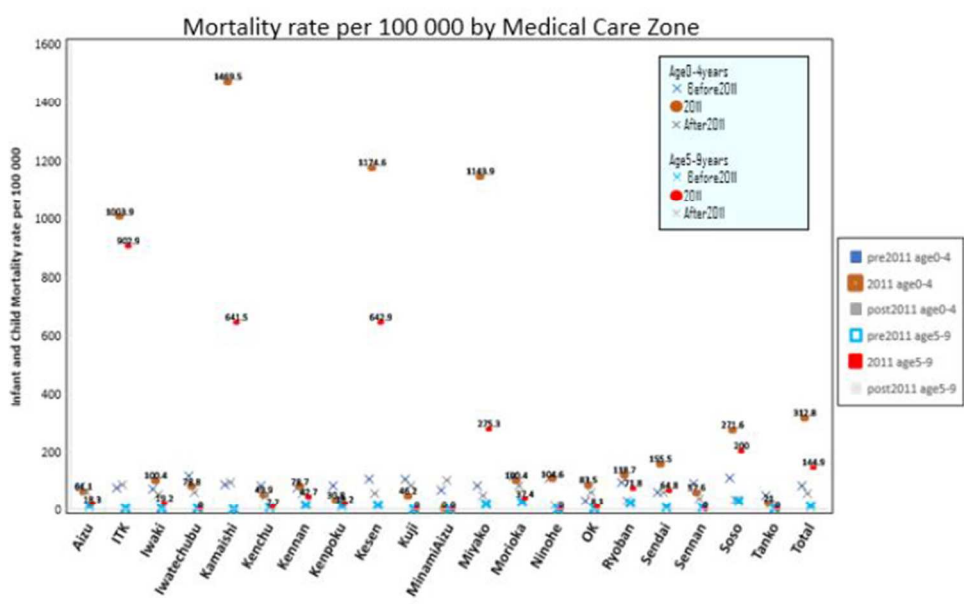

194x118mm (300 x 300 DPI)

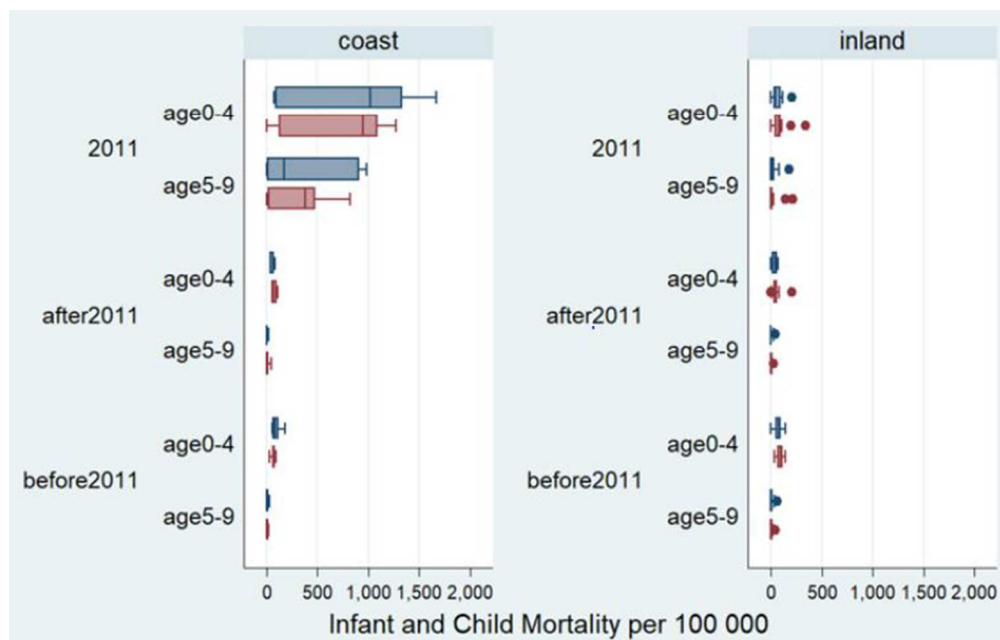

200x126mm (300 x 300 DPI)



1  
2  
3  
4  
5  
6  
7  
8  
9  
10  
11  
12  
13  
14  
15  
16  
17  
18  
19  
20  
21  
22  
23  
24  
25  
26  
27  
28  
29  
30  
31  
32  
33  
34  
35  
36  
37  
38  
39  
40  
41  
42  
43  
44  
45  
46  
47  
48  
49  
50  
51  
52  
53  
54  
55  
56  
57  
58  
59  
60

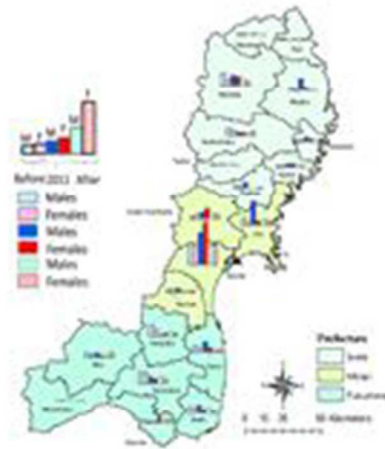

Fig.5-a. Number of infant death (aged 0 years)

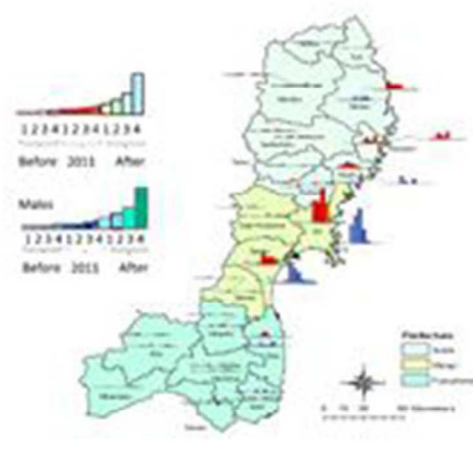

Fig.5-b. Number of child death (aged 1-4 years)

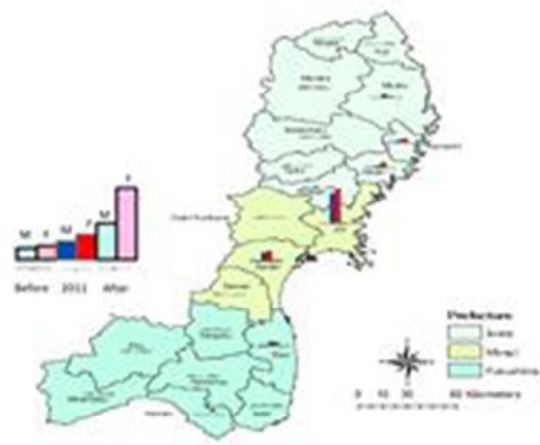

Fig.5-c. Number of child death (aged 5-9 years)

Figure 5-a. Number of infant death (aged 0 years). Figure 5-b. Number of infant death (aged 0 years).  
Figure 5-c. Number of infant death (aged 0 years)

99x107mm (300 x 300 DPI)

# BMJ Open

## Differences in infant and child mortality before and after the Great East Japan Earthquake and Tsunami: A large population-based ecological study

|                                 |                                                                                                                                                                                                                                                                                                                                           |
|---------------------------------|-------------------------------------------------------------------------------------------------------------------------------------------------------------------------------------------------------------------------------------------------------------------------------------------------------------------------------------------|
| Journal:                        | <i>BMJ Open</i>                                                                                                                                                                                                                                                                                                                           |
| Manuscript ID                   | bmjopen-2018-022737.R1                                                                                                                                                                                                                                                                                                                    |
| Article Type:                   | Research                                                                                                                                                                                                                                                                                                                                  |
| Date Submitted by the Author:   | 30-Jul-2018                                                                                                                                                                                                                                                                                                                               |
| Complete List of Authors:       | Tashiro, Ai; Tohoku University, Graduate School of Tohoku University Sakisaka, Kayako; Teikyo University , Graduate School of Public Health Okamoto, Etsuji; The University of Fukuchiyama Yoshida, Honami; Kanagawa Prefectural Government, Healthcare New Frontier Promotion Headquarters Office; Kanagawa University of Human Services |
| <b>Primary Subject Heading</b>: | Public health                                                                                                                                                                                                                                                                                                                             |
| Secondary Subject Heading:      | Epidemiology, Global health, Public health                                                                                                                                                                                                                                                                                                |
| Keywords:                       | Great East Japan Earthquake and Tsunami, population-based ecological study, vulnerability, child healthcare disparities, infant and child mortality, GIS                                                                                                                                                                                  |
|                                 |                                                                                                                                                                                                                                                                                                                                           |

SCHOLARONE™  
Manuscripts

Only

**Research article**

Differences in infant and child mortality before and after the Great East Japan Earthquake and Tsunami: A large population-based ecological study

Ai Tashiro<sup>1\*</sup>, Kayako Sakisaka<sup>2</sup>, Etsuji Okamoto<sup>3</sup>, and Honami Yoshida<sup>4,5</sup>

**Author affiliations**

<sup>1</sup>Graduate School of Environmental Studies, Tohoku University, Miyagi, Japan

<sup>2</sup>Teikyo University Graduate School of Public Health, Tokyo, Japan

<sup>3</sup>Department of Health and Welfare Management, the University of Fukuchiyama, Kyoto, Japan

<sup>4</sup>Healthcare New Frontier Promotion Headquarters Office, Kanagawa Prefectural Government, Kanagawa, Japan

<sup>5</sup>Kanagawa University of Human Services, Kanagawa, Japan

\*Corresponding author: Ai Tashiro (e-mail: atashiro11@gmail.com).

**Word count: 3,827**

## ABSTRACT

**Objectives:** To examine associations between access to medical care, geological data, and infant and child mortality in the area of Northeastern Japan that was impacted by the Great East Japan Earthquake and Tsunami (GEJET) in 2011.

**Design:** A population-based ecological study using publicly available data.

**Setting:** Twenty secondary medical areas in the disaster-affected zones in the northeastern prefectures of Japan (Iwate, Fukushima, and Miyagi).

**Participants:** Children younger than ten years who died in the twenty secondary medical areas between 2008 and 2014 (N= 1 748).

**Primary and secondary outcome measures:** Multiple regression analysis for infant and child mortality rate. The mean values were applied for infant and child mortality rates and other factors before the GEJET (2008–2010) and after the GEJET (2012–2014).

**Results:** Between 2008 and 2014, the most common cause of death among children younger than ten years was accidents. The mortality rate per 100 000 persons was 39.1±41.2 before 2011, 226.7±43.4 in 2011, and 31.4±39.1 after 2011. Regression analysis revealed that the mortality rate was positively associated with low age in each period, while the coastal zone was negatively associated with fewer disaster base hospitals in 2011. By contrast, the number of obstetrics and gynecology centers ( $\beta = -189.9$ ,  $p=0.02$ ) and public health nurses ( $\beta = -1.7$ ,  $p=0.01$ ) were negatively associated with mortality rate per person in 2011.

**Conclusions:** In 2011, the mortality rate among children younger than ten years was 6.4 times higher than that before and after 2011. Residence in a coastal zone was significantly associated with higher child mortality rates.

**Keywords:** Great East Japan Earthquake and Tsunami, population-based ecological study, vulnerability, child healthcare disparities, infant and child mortality, GIS

### Strengths and limitations of this study

- This study integrates infant and child mortality data with GIS information to assess the influence of damages caused by a natural disaster on child healthcare.
- A longitudinal study of statistical as well as geological distribution was used to evaluate differences in child mortality before, during, and after 2011 by sex, age group, and the secondary medical area in the disaster-affected zone.
- Since this ecological study used publicly available data, we were not able to assess and identify individual social and economic factors influencing child mortality during the study period.

## INTRODUCTION

Natural disasters cause significant socioeconomic damages and large-scale deaths. Compared with adults, infants and children are more vulnerable during and after natural disasters[1]. On March 11 2011, the Great East Japan Earthquake and Tsunami (GEJET) struck Northeastern Japan, and the tsunami that followed caused massive damage and a high death rate, particularly of children in coastal zones due to several reasons, including drowning. Particularly among children in coastal zones, in 2011, the death rate of children younger than 10 years in areas affected by the earthquake and tsunami increased by 40%[2]. Given this demographic profile, the influence of natural disasters on mortality, particularly of infants and children, is not well understood.

Areas affected by the earthquake and tsunami were generally poorer. The disaster significantly crippled the medical resources and healthcare services for infants and children. Although Hurricane Katrina in 2005 and the Southern California wildfires in 2017 reinforced the need to provide pediatric unitspecific guidelines to medical personnel responding to disasters in both hospital and pre-hospital settings in the U.S.[3, 4, 5], as of 2011, the lack of a regional disaster medical management plan in Japan resulted in difficulty in responding to the healthcare needs of children at risk. Disaster medical assistance teams (DMATs), which were launched in 2005 were unable to respond to expectant or nursing mothers and children due to the lack of an information sharing system and network with local hospitals, clinics, and emergency-response organizations[6, 7, 8]. Regarding the establishment of a liaison system between DMATs and local medical care organizations, only a few prior studies determined the influence of disaster on child mortality and examined the association between areas with poor medical resources and how to manage preventable child deaths[9, 10].

1 In this paper, we investigated the dynamics of infant and child mortality (age, 0–9 years) in Northeastern  
2  
3 Japan before and after 2011. This study aimed to examine the associations between the different  
4  
5 characteristics of medical care, including the preparedness of obstetrics and gynecology (Ob-gyn) centers,  
6  
7 pediatricians and public health nurses (PHNs), and the geological distribution of hospitals/clinics. We also  
8  
9 determined the influence of changes in normal and emergency conditions on infant and child mortality.  
10  
11 Empirical evidence on these different aspects of large population-based ecological time series regarding  
12  
13 infant and child mortality can contribute to the establishment of a local liaison system for pediatric and  
14  
15 perinatal medical care during disasters.  
16  
17  
18  
19  
20  
21  
22  
23  
24  
25

## 26 **METHODS**

### 27 **Study population**

28  
29 Due to the influence of geographic and social characteristics on patterns of inundation and casualties, we  
30  
31 compared data from Iwate, Miyagi, and Fukushima. These regions share common topographical features,  
32  
33 namely, a deeply indented coastline with narrow flatlands bordered by sea and mountains, which increases  
34  
35 their vulnerability to damage caused by tsunami. The total number of clustered secondary medical areas  
36  
37 (SMAs) was 20 (Figure 1). From 2008 to 2014, according to the Data Warehouse for Healthcare and  
38  
39 Welfare Plan (DWH) database, a total of 1 748 deaths occurred among children aged 0–9 years in Iwate,  
40  
41 Fukushima, and Miyagi (0–4 years: 1 345; 5–9 years: 403). In 2011, a total of 717 deaths occurred among  
42  
43 children aged 0–9 years in the three prefectures (Iwate: 168; Miyagi: 452; and Fukushima: 97).  
44  
45  
46  
47  
48  
49  
50  
51  
52  
53  
54  
55  
56

57 **\*Figure 1. Map of the study area\***

## Study site

Regarding medical resources, we mapped the location of disaster base hospitals (DBHs) in Figure 2, including core disaster medical hospitals (CDMHs) and local disaster medical centers (LDMCs) and added data from other medical facilities, such as perinatal medical centers (PMCs), pediatric clinics, and Ob-Gyn clinics in Figure 2-a. We also gave a 10 km margin from each DBH and observed the range of coverage of those medical facilities in Figure 2-b. Most SMAs had DBHs except the Iwate-chubu and Soso areas. Meanwhile, the coastal zones in Iwate, Kuji, Miyako, Kamaishi, and Kesen also had DBHs. Most of these DBHs combined PMC function but had few pediatric units. Most pediatric units were distributed out of the 10 km margin in Iwate. In Miyagi, most DBHs were centralized in the inland zone and Sendai, which is the prefectural capital of Miyagi.

As of 2014, the numbers of full time doctors and clinics were as follows: pediatric clinics, 824 (Iwate: 290, Miyagi: 404, Fukushima: 497); pediatricians, 1 191 (Iwate: 290, Miyagi: 404, Fukushima: 497); Ob-Gyn clinics, 216 (Iwate: 81, Miyagi: 49, Fukushima: 88), Ob-Gyn doctors, 332 (Iwate: 124, Miyagi: 62, Fukushima: 146). Regarding PMC, Iwate and Miyagi had ten each, and Fukushima had five. Meanwhile, regarding disaster medical facilities, Iwate had 11 DBHs (2 CDMHs and 9 LDMCs); Miyagi had 13 DBHs (1 CDMH and 12 LDMCs), and Fukushima had 8 DBHs (1 CDMH and 7 LDMCs). In Fukushima, Soso did not have a DBH, as shown in Figure 2. While each DBH was located in inland areas in each SMA except Iwaki, in the coastal zone, pediatric units were located along the coast and did not cover the 10-km margin of the DBH. Iwaki had a DBH and centralized PMCs for neighboring coastal zones.



1 **\*Figure 2.** Location of DBHs, including CDMHs and LDMCs.\*  
2  
3  
4  
5

## 6 **Study design and setting**

7

8  
9 We performed a population-based ecological study using data from the Statistical Bureau of Japan  
10 (*e-Stat*)[11] and from the Data Warehouse for Healthcare and Welfare Plan (DWH)[12]. *e-Stat* is the official  
11  
12 portal for Japanese government statistics. Each database is produced by all ministries in the government.  
13  
14 *e-Stat* records ecological data of several categories, such as prefectures, age groups, and sex, to analyze the  
15  
16 mortality rates of specific areas and age groups. However, we could not complete the analysis by only using  
17  
18 data from *e-Stat*. Thus, we also used data from the DWH database, which categorizes more specific factors,  
19  
20 such as medical administration, health center area, and municipal data, such as the number of PHNs; death  
21  
22 by age, sex, and year; and categorized medical areas. In Japan, medical administration areas are broadly  
23  
24 divided into three units: each municipality is designated as a primary medical area, a combination of two  
25  
26 municipalities is designated as an SMA, and a prefecture is designated as a tertiary medical area. Under the  
27  
28 Medical Care Act, the SMA is defined as the essential unit for health care planning, within which all  
29  
30 necessary care shall be provided. Based on this principle, we used the SMA as the unit of analysis in our  
31  
32 ecological study design to identify the inequality of medical resources and to determine the influence of  
33  
34 available medical resources on infant and child mortality.  
35  
36  
37  
38  
39  
40  
41  
42  
43  
44  
45  
46  
47  
48

49 Regarding medical resources, our study used the database of the Japan Medical Analysis Platform  
50  
51 (JMAP)[13], Japan Association of Obstetricians and Gynecologists (JAOG)[14], and Medicare Information  
52  
53 Laboratory (MIL)[15]. JMAP collects medical information and institutional data nationwide. We obtained  
54  
55 the number of medical doctors by detailed categories. JAOG records information from comprehensive/local  
56  
57  
58  
59  
60

1 perinatal maternal child medical centers and PMCs. Meanwhile, the MIL of the Ministry of Health, Labour  
2  
3 and Welfare records a list of DBHs, including CDMHs and LDMCs. A DBH is a disaster-ready hospital,  
4  
5 which has a function of supporting local medical institutions and accepts the seriously ill and seriously  
6  
7 disabled. DBHs are placed as hospitals to play a central role in medical care relief activities during disasters.  
8  
9  
10  
11  
12 In principle, each prefecture should have more than one CDMH, and each SMA should have more than one  
13  
14  
15 LDMC.

16  
17  
18 We analyzed data from *e-Stat*, DWH, JMAP, JAOG, and MIL in three prefectures (Iwate, Fukushima, and  
19  
20 Miyagi) from 2008 to 2014. We investigated damages and impacts of disasters during a 7-year period, i.e.,  
21  
22 before the GEJET (2008–2010), 2011, and after the GEJET (2012–2014). We chose these three prefectures  
23  
24 because they were the most severely affected prefectures in 2011, and more than 99% of all deaths were  
25  
26 recorded in these areas[16]. Integrating data from *e-Stat*, DWH, JMAP, JAOG, and MIL enabled us to  
27  
28  
29 identify mortality rates by sex, age group, and region.  
30  
31  
32  
33  
34  
35  
36  
37

### 38 **Measurements**

39  
40 We analyzed infant and child mortality rates by sex, age group (0–4 years and 5–9 years), and SMA in Iwate,  
41  
42 Miyagi, and Fukushima. The leading causes of mortality by sex, study span, and SMA were examined for  
43  
44 each age group. To calculate death rates per 100 000 inhabitant children younger than ten years, official  
45  
46 resident registration data for inhabitants were used. We calculated the age-specific death rate using the  
47  
48 administrative reports of resident registries of municipalities in *e-Stat* and DWH as denominators. The  
49  
50 specific causes of death for ages 0–4 years and 5–9 years were ranked up to 5th from 2008 to 2014 in Japan.  
51  
52  
53  
54  
55  
56  
57 Demographic and ecological characteristics were also analyzed to examine deaths caused by natural  
58  
59

1 disasters. To determine the potential effect of disasters on the different SMA mortality rates, we analyzed  
2  
3 ecological characteristics using Geographic Information Systems[17]. We mapped the bar graph of infant  
4  
5 and child deaths. We also mapped the location of medical facilities, such as pediatric units, Ob-Gyn clinics,  
6  
7 DBHs, and PMCs using ArcGIS version 10.4 (Esri, Redlands, CA)[18]. Also, to determine the DBH  
8  
9 coverage of neighboring medical facilities and clinics, we gave a 10 km margin from each DBH location.  
10  
11  
12  
13  
14  
15  
16  
17

### 18 **Patient and public involvement**

19  
20 In this study, patients and the public were not involved.  
21  
22  
23  
24  
25

### 26 **Statistical analysis**

27  
28 Quantitative variables are presented as means±standard deviation (SD). We conducted multiple regression  
29  
30 analysis of infant and child mortality rates according to each of the classified periods (before 2011, during  
31  
32 2011, and after 2011). Regression model analyses were applied for infant and child mortality rates before the  
33  
34 GEJET (2008–2010) and after the GEJET (2012–2014). To examine the associations between mortality rate  
35  
36 and ecological characteristics, we included 12 variables in the regression models. Dummy variables were  
37  
38 used for sex, age group (0–4 years vs. 5–9 years), locations of SMAs, locations of DBHs, and prefecture.  
39  
40  
41 Meanwhile, the continuous variables were the number of DBHs, pediatric units, pediatricians per 100 000  
42  
43 population, Ob-Gyn clinics, Ob-Gyn doctors per 100 000 population, and PHNs. Statistical significance was  
44  
45 tested at a two-sided significance level of 0.05, and all confidence intervals were reported as two-sided  
46  
47 values with a confidence level of 95%. Statistical analyses were performed using Stata 14.0 (Stata Corp.,  
48  
49 College Station, TX)[19].  
50  
51  
52  
53  
54  
55  
56  
57  
58  
59  
60

## RESULTS

Table 1 summarizes the baseline characteristics of medical resources in Iwate, Miyagi, and Fukushima. Data were expressed as mean  $\pm$  SD. As shown in Table 1, medical resources in Iwate were significantly fewer than those in other prefectures. In particular, the mean number of pediatric clinics in Iwate was lower than those in other prefectures (Iwate: 12.8, Miyagi: 80.3, and Fukushima: 99.0). The national average of pediatricians per 100 000 population was 17.9 and that of Ob-Gyn doctors was 3.94 in 2015. Compared with this data, those of the study areas were lower.

**Table 1** Baseline characteristics of medical resources in affected areas of the three prefectures

| Medical Resources                           | Iwate       | Miyagi      | Fukushima    |
|---------------------------------------------|-------------|-------------|--------------|
| <i>Pediatric clinic</i>                     | 12.8 (14.3) | 80.3 (97.6) | 99.0 (144.6) |
| <i>Pediatricians per 100 000 population</i> | 8.0 (2.5)   | 12.5 (1.6)  | 23.8 (8.9)   |
| <i>Pediatrician</i>                         | 32 (60.4)   | 101 (123.9) | 70 (57.5)    |
| <i>PMC</i>                                  | 1.1 (0.9)   | 2.5 (1.7)   | 0.7 (0.8)    |
| <i>Ob-Gyn per 100 000 population</i>        | 2.9 (1.9)   | 2.7 (0.5)   | 3.6 (1.1)    |
| <i>Ob-Gyn clinic</i>                        | 4.9 (5.9)   | 22.0 (32.1) | 19.8 (30.1)  |
| <i>Ob-Gyn Dr.</i>                           | 7 (8.6)     | 37 (56.4)   | 17 (18.4)    |
| <i>PHN</i>                                  |             |             |              |
| PHN before 2011                             | N/A         | N/A         | N/A          |
| PHN 2011                                    | 128 (55.8)  | 365 (92.3)  | 204 (119.3)  |
| PHN after 2011                              | 132 (54.6)  | 371 (86.1)  | 213 (99.9)   |

*Note:* The value of each medical resource was expressed as mean (SD) before 2011 (2008–2010), during 2011, and after 2011 (2012–2014).

1 The mortality rate per 100 000 population as classified according to the medical care area (SMA) is shown  
2  
3  
4 in Figure 3. From this figure, the mortality rates before and after 2011 were only minimally different among  
5  
6 the SMAs, and were lower than 100 per 100 000 population. By contrast, the rates were significantly higher  
7  
8 in 2011 than in the other periods. The mortality rates were higher in coastal zones, such as  
9  
10  
11  
12  
13  
14  
15  
16  
17  
18  
19  
20  
21  
22  
23  
24  
25  
26  
27  
28  
29  
30  
31  
32  
33  
34  
35  
36  
37  
38  
39  
40  
41  
42  
43  
44  
45  
46  
47  
48  
49  
50  
51  
52  
53  
54  
55  
56  
57  
58  
59  
60

particular, the mortality rate for children aged 0–4 years in Kamaishi was 1 469.5 per 100 000 population, which was the highest among all 20 SMAs.

\* **Figure 3.** Mortality rate per 100 000 population as classified according to medical care area\*

Figure 4 shows the influence of SMA location on infant and child mortality by age group, sex, and period. From this mortality boxplot, we can see that the mortality rate of children younger than 10 years was significantly higher than those before and after 2011 in coastal zones. Moreover, the mortality rate of children aged 0–4 years was higher than that of children aged 5–9 years. Furthermore, the mortality rates of males were higher than those of females in the coastal zone. Meanwhile, regardless of age, sex, and period, mortality rates followed a similar pattern in the inland zone, in which each mean mortality rate was not statistically different.

\***Figure 4.** Influence of SMA location on infant and child death by age group, sex, and period\*

1 A total of 1 748 deaths of children aged 0–9 years were confirmed in the 20 SMAs from 2008 to 2014 in  
 2  
 3 the affected area. Table 2 summarizes the mortality rate of children younger than 10 years according to the  
 4  
 5 availability of medical resources in target areas before, during, and after 2011. A total of 1 062 infant and  
 6  
 7 child deaths were identified; the mean death rate before 2011 was 191, the number of death in 2011 was 717,  
 8  
 9 and the mean death rate after 2011 was 152.7. As shown in Table 2, the values are presented as numbers or  
 10  
 11 means of mortality rate by individual attributes (sex, age group, mortality rate per 100 000 population,  
 12  
 13 region, and location of DBH) for infants and children by periods. The results show no significant difference  
 14  
 15 in the proportion of death rate as analyzed according to sex from 2008 to 2014. However, the number of  
 16  
 17 male deaths in 2011 was 3.5 times higher than before 2011 and 4.2 times higher than after 2011. The rate of  
 18  
 19 female deaths was 4.1 times higher than before 2011 and 5.3 times higher than after 2011. Regarding age  
 20  
 21 group, in each period, the number of deaths of children aged 0–4 years was higher than that of children aged  
 22  
 23 5–9 years. Proportionate gaps of death were noted between those aged 0–4 years and 5–9 years before and  
 24  
 25 after 2011 (72.8–74.6%). However, the gaps decreased to 25.2% in 2011. In 2011, the mortality rate in the  
 26  
 27 coastal zone was 11.7 times higher than in the inland zone. Meanwhile, the mortality rate in DBHs along the  
 28  
 29 coast was 10 times higher than in those not along the coastal zone.  
 30  
 31  
 32  
 33  
 34  
 35  
 36  
 37  
 38  
 39  
 40  
 41  
 42  
 43  
 44  
 45

46 **Table 2** Population mortality of children younger than 10 years and medical resources in the target areas  
 47  
 48 before, during, and after 2011  
 49

|                | Before 2011<br>2008–2010 | 2011       | After 2011<br>2012–2014 |
|----------------|--------------------------|------------|-------------------------|
| <b>Sex</b>     |                          |            |                         |
| Male (N=550)   | 104 (54.3)               | 361 (50.3) | 85 (55.9)               |
| Female (N=511) | 88 (45.7)                | 356 (49.7) | 67 (44.1)               |

58 **Age group**

|                                           |            |             |            |
|-------------------------------------------|------------|-------------|------------|
| 0–4 years (N=748)                         | 167 (87.3) | 449 (62.6)  | 132 (86.4) |
| 5–9 years (N=313)                         | 24 (12.7)  | 268 (37.4)  | 21 (13.6)  |
| <b>Mortality rate per 100 000</b>         |            |             |            |
| <b>(N=1067)<sup>b</sup></b>               | 39.1±41.2  | 226.7±43.4  | 31.4±39.1  |
| <b>Secondary medical area<sup>b</sup></b> |            |             |            |
| Coastal (N=795.8)                         | 41.8±42.3  | 456.5±489.4 | 33.9±34.0  |
| Inland (N=265.9)                          | 36.8±40.5  | 38.7±44.7   | 29.4±36.5  |
| <b>Location of DBH<sup>b</sup></b>        |            |             |            |
| Not along the coast<br>(N=175.2)          | 37.0±41.5  | 54.9±70.6   | 27.0±34.0  |
| Along the coast<br>(N=886.5)              | 42.9±40.7  | 545.7±519.6 | 39.5±35.2  |

**Note:** Values are shown as n (%) or mean±SD. Each mean of values presents factors potentially affecting the mortality rate, and variables were analyzed using the student *t*-test at the 5% level of significance. All values were statistically significant at  $\alpha = 0.05$ .

**\*Figure 5.** Mortality distribution among children aged 0–9 years in affected areas in 2011 by SMA\*

Figure 5 presents the mortality distribution of children aged 0–9 years in the affected areas before, during, and after 2011 by SMA. As shown in Figure 5-a, the number of deaths in Sendai was the highest, with 49 infant deaths in 2011 (males: 21, females: 28). ITK recorded 25 deaths in 2011. Tangentially, the number of male deaths was higher than female deaths, and the mortality rate was remarkably high along the coastal zones, particularly in 2011. As shown in Figure 5-b, among children aged 1–4 years, the number of deaths before and after 2011 was lower than that in 2011. Among children aged 1–4 years, the number of deaths in ITK was the highest at 123 (42.8%) out of the total 237 deaths in 2011. In particular, 45 (36.6%) out of the 123 children who died were 3-year olds. Among children aged 5–9 years, 268 died in 2011 (Figure 5-c). Similar to the mortality rate of those aged 1–4 years, the child mortality rate among those aged 5–9 years was also the highest in ITK at 145 (54.1%) in 2011.

1 The top five causes of child mortality among children aged 0–9 years from 2008 to 2014 are shown in  
2  
3  
4 Table 3. Before and after 2011, congenital deformities were the primary cause of death among those aged 0  
5  
6 years in Japan (mortality rate = 81.3%). Accidental death was ranked fifth before 2011, but ranked third in  
7  
8 2011 (mortality rate = 18.7%). Among children aged 1–4 years, congenital deformities were also the primary  
9  
10 cause of death except in 2008 and 2011 (mean mortality rate = 3.8%). The mean rate of accidental death was  
11  
12 3.8% in 2008 and 9.1% in 2011. Meanwhile, accident was the primary cause of death among children aged  
13  
14 5–9 years from 2008 to 2013. The mortality rate due to natural disasters in 2011 was three times higher than  
15  
16 that in other periods.  
17  
18  
19  
20  
21  
22

23 Sex, age group, the location of SMA, prefecture, DBH, and the number of pediatric clinics per 100 000  
24  
25 population, pediatricians, Ob-Gyn clinics, Ob-Gyn clinics per 100 000 population, Ob-gyn doctors, and  
26  
27 PHNs were tested for their association with infant and child mortality in the 20 SMAs (Table 4). In this  
28  
29 analysis, no significant differences ( $p>0.05$ ) in the mortality rate regarding sex were noted before and after  
30  
31 2011. By contrast, significant differences were noted in child mortality as assessed according to age group.  
32  
33 The mortality rate of children aged 0–4 years was higher than those aged 5–9 years before, during, and after  
34  
35 2011 ( $p<0.01$ ). In 2011, the mortality rate was positively associated with the location of DBH, the number of  
36  
37 DBHs, and the number of PHNs in the 20 SMAs, indicating that in 2011, the occurrence of the natural  
38  
39 disaster and existence of fewer medical resources were associated with increased infant and child mortality  
40  
41 rates. By contrast, the mortality rate was negatively associated with the number of Ob-Gyn centers in 2011,  
42  
43 indicating that a higher number of Ob-Gyn centers was associated with decreased infant mortality rate ( $\beta =$   
44  
45  $-189.9$ ,  $p=0.02$ ).  
46  
47  
48  
49  
50  
51  
52  
53  
54  
55  
56  
57  
58  
59  
60



**Table 3** Causes of death and the mortality rate per 100 000 population for children aged under ten years

| Age     | Rank | Before 2011            |      |                        |      | 2011                   |      | After 2011             |      |                        |      | 2014                   |      |                        |      |
|---------|------|------------------------|------|------------------------|------|------------------------|------|------------------------|------|------------------------|------|------------------------|------|------------------------|------|
|         |      | 2008                   | 2009 | 2010                   | 2010 | MR                     | 2012 | 2013                   | 2013 |                        |      |                        |      |                        |      |
|         |      | COD                    | M R  | COD                    | M R  | COD                    | M R  | COD                    | MR   | COD                    | MR   | COD                    | M R  | COD                    | M R  |
| 0year   | 1    | Congenital deformities | 91.5 | Congenital deformities | 83.8 | Congenital deformities | 85.4 | Congenital deformities | 81.9 | Congenital deformities | 77.8 | Congenital deformities | 78.4 | Congenital deformities | 70.4 |
|         | 2    | Respiration Disorders  | 34.6 | Respiration Disorders  | 33.7 | Respiration Disorders  | 34.1 | Respiration Disorders  | 30.5 | Respiration Disorders  | 30.2 | Respiration Disorders  | 29.9 | Respiration Disorders  | 24.6 |
|         | 3    | SIDS                   | 41.1 | SIDS                   | 13.5 | SIDS                   | 13.1 | accidental death       | 18.7 | SIDS                   | 13.6 | SIDS                   | 11.8 | SIDS                   | 0.2  |
|         | 4    | Accidental death       | 31.0 | Accidental death       | 11.4 | Accidental death       | 10.5 | SIDS                   | 12.3 | Accidental death       | 9.0  | Accidental death       | 8.6  | Haemorrhagic Diseases  | 0.3  |
|         | 5    | Haemorrhagic Diseases  | 11.7 | Haemorrhagic Diseases  | 9.3  | Haemorrhagic Diseases  | 7.9  | Haemorrhagic Diseases  | 8.1  | Haemorrhagic Diseases  | 7.8  | Haemorrhagic Diseases  | 7.4  | Accidental death       | 7.9  |
| 1-4year | 1    | Accidental death       | 3.8  | Congenital deformities | 3.8  | Congenital deformities | 3.8  | Accidental death       | 9.1  | Congenital deformities | 4.2  | Congenital deformities | 3.4  | Congenital deformities | 3.8  |
|         | 2    | Congenital deformities | 3.8  | Accidental death       | 3.5  | Accidental death       | 3.5  | Congenital deformities | 3.9  | Accidental death       | 2.9  | Accidental death       | 2.6  | Accidental death       | 2.6  |

|         |                |                        |                |                        |                |                        |                |                        |                |                        |                |                                    |                |                        |     |
|---------|----------------|------------------------|----------------|------------------------|----------------|------------------------|----------------|------------------------|----------------|------------------------|----------------|------------------------------------|----------------|------------------------|-----|
| 3       | Cancer         | 2.2                    | Cancer         | 2.0                    | Cancer         | 2.0                    | Cancer         | 1.9                    | Cancer         | 2.4                    | Cancer         | 2.0                                | Cancer         | 1.6                    |     |
| 4       | Pneumonia      | 1.3                    | Heart Diseases | 1.5                    | Pneumonia      | 1.7                    | Pneumonia      | 1.8                    | Heart Diseases | 1.4                    | Heart Diseases | 1.3                                | Heart Diseases | 1.2                    |     |
| 5       | Heart Diseases | 1.2                    |                | 1.0                    | Heart Diseases | 1.3                    | Heart Diseases | 1.4                    | Pneumonia      | 1.1                    | Pneumonia      | 1.3                                | Pneumonia      | 1.2                    |     |
| 5-9year | 1              | Accidental death       | 2.2            | Accidental death       | 2.2            | Accidental death       | 2.3            | Accidental death       | 6.5            | Accidental death       | 1.9            | Accidental death                   | 2.0            | Cancer                 | 1.9 |
|         | 2              | Cancer                 | 1.8            | Cancer                 | 1.8            | Congenital deformities | 1.9            | Cancer                 | 1.8            | Cancer                 | 1.6            | Cancer                             | 2.0            | Accidental death       | 1.7 |
|         | 3              | Other Cancers          | 0.7            | Heart Diseases         | 0.7            | Cancer                 | 0.5            | Other Cancers          | 0.7            | Congenital deformities | 0.7            | Other Cancers                      | 0.7            | Congenital deformities | 0.6 |
|         | 4              | Heart Diseases         | 0.6            | Other Cancers          | 0.6            | Pneumonia              | 0.5            | Congenital deformities | 0.6            | Other Cancers          | 0.6            | Heart Diseases                     | 0.4            | Heart Diseases         | 0.5 |
|         | 5              | Congenital deformities | 0.6            | Congenital deformities | 0.6            | Heart Diseases         | 0.4            | Heart Diseases         | 0.5            | Pneumonia              | 0.5            | Pneumonia / Congenital deformities | 0.4            | Pneumonia              | 0.5 |

**Note:** COD, cause of death; MR, mortality rate per 100 000 population.

| Age   | Rank | Before 2011            |      |                        |      |                        |      | 2011                   |      | After 2011             |      |                        |      |                        |      |
|-------|------|------------------------|------|------------------------|------|------------------------|------|------------------------|------|------------------------|------|------------------------|------|------------------------|------|
|       |      | 2008                   |      | 2009                   |      | 2010                   |      | COD                    | MR   | 2012                   |      | 2013                   |      | 2014                   |      |
|       |      | COD                    | MR   |
| 0year | 1    | Congenital deformities | 91.5 | Congenital deformities | 83.8 | Congenital deformities | 85.4 | Congenital deformities | 81.9 | Congenital deformities | 77.8 | Congenital deformities | 78.4 | Congenital deformities | 70.4 |

1  
2  
3  
4  
5  
6  
7  
8  
9  
10  
11  
12  
13  
14  
15  
16  
17  
18  
19  
20  
21  
22  
23  
24  
25  
26  
27  
28  
29  
30  
31  
32  
33  
34  
35  
36  
37  
38  
39  
40  
41  
42  
43  
44  
45  
46  
47

|         |   |                        |      |                        |      |                        |      |                        |      |                        |      |                        |      |                        |      |
|---------|---|------------------------|------|------------------------|------|------------------------|------|------------------------|------|------------------------|------|------------------------|------|------------------------|------|
|         | 2 | Respiration Disorders  | 34.6 | Respiration Disorders  | 33.7 | Respiration Disorders  | 34.1 | Respiration Disorders  | 30.5 | Respiration Disorders  | 30.2 | Respiration Disorders  | 29.9 | Respiration Disorders  | 24.6 |
|         | 3 | SIDS                   | 14.1 | SIDS                   | 13.5 | SIDS                   | 13.1 | accidental death       | 18.7 | SIDS                   | 13.6 | SIDS                   | 11.8 | SIDS                   | 0.2  |
|         | 4 | Accidental death       | 13.0 | Accidental death       | 11.4 | Accidental death       | 10.5 | SIDS                   | 12.3 | Accidental death       | 9.0  | Accidental death       | 8.6  | Haemorrhagic Diseases  | 0.3  |
|         | 5 | Haemorrhagic Diseases  | 11.7 | Haemorrhagic Diseases  | 9.3  | Haemorrhagic Diseases  | 7.9  | Haemorrhagic Diseases  | 8.1  | Haemorrhagic Diseases  | 7.8  | Haemorrhagic Diseases  | 7.4  | Accidental death       | 7.9  |
| 1-4year | 1 | Accidental death       | 3.8  | Congenital deformities | 3.8  | Congenital deformities | 3.8  | Accidental death       | 9.1  | Congenital deformities | 4.2  | Congenital deformities | 3.4  | Congenital deformities | 3.8  |
|         | 2 | Congenital deformities | 3.8  | Accidental death       | 3.5  | Accidental death       | 3.5  | Congenital deformities | 3.9  | Accidental death       | 2.9  | Accidental death       | 2.6  | Accidental death       | 2.6  |
|         | 3 | Cancer                 | 2.2  | Cancer                 | 2.0  | Cancer                 | 2.0  | Cancer                 | 1.9  | Cancer                 | 2.4  | Cancer                 | 2.0  | Cancer                 | 1.6  |
|         | 4 | Pneumonia              | 1.3  | Heart Diseases         | 1.5  | Pneumonia              | 1.7  | Pneumonia              | 1.8  | Heart Diseases         | 1.4  | Heart Diseases         | 1.3  | Heart Diseases         | 1.2  |
|         | 5 | Heart Diseases         | 1.2  |                        | 1.0  | Heart Diseases         | 1.3  | Heart Diseases         | 1.4  | Pneumonia              | 1.1  | Pneumonia              | 1.3  | Pneumonia              | 1.2  |
| 5-9year | 1 | Accidental death       | 2.2  | Accidental death       | 2.2  | Accidental death       | 2.3  | Accidental death       | 6.5  | Accidental death       | 1.9  | Accidental death       | 2.0  | Cancer                 | 1.9  |
|         | 2 | Cancer                 | 1.8  | Cancer                 | 1.8  | Congenital deformities | 1.9  | Cancer                 | 1.8  | Cancer                 | 1.6  | Cancer                 | 2.0  | Accidental death       | 1.7  |
|         | 3 | Other Cancers          | 0.7  | Heart Diseases         | 0.7  | Cancer                 | 0.5  | Other Cancers          | 0.7  | Congenital deformities | 0.7  | Other Cancers          | 0.7  | Congenital deformities | 0.6  |
|         | 4 | Heart Diseases         | 0.6  | Other Cancers          | 0.6  | Pneumonia              | 0.5  | Congenital deformities | 0.6  | Other Cancers          | 0.6  | Heart Diseases         | 0.4  | Heart Diseases         | 0.5  |

|   |                        |     |                        |     |                |     |                |     |           |     |                                      |     |           |     |
|---|------------------------|-----|------------------------|-----|----------------|-----|----------------|-----|-----------|-----|--------------------------------------|-----|-----------|-----|
| 5 | Congenital deformities | 0.6 | Congenital deformities | 0.6 | Heart Diseases | 0.4 | Heart Diseases | 0.5 | Pneumonia | 0.5 | Pneumonia/<br>Congenital deformities | 0.4 | Pneumonia | 0.5 |
|---|------------------------|-----|------------------------|-----|----------------|-----|----------------|-----|-----------|-----|--------------------------------------|-----|-----------|-----|

| Age     | Rank | Before 2011            |      |                        |      | 2011                   |      |                        |      | After 2011             |      |                        |      |                        |      |
|---------|------|------------------------|------|------------------------|------|------------------------|------|------------------------|------|------------------------|------|------------------------|------|------------------------|------|
|         |      | 2008                   |      | 2009                   |      | 2010                   |      | 2011                   |      | 2012                   |      | 2013                   |      | 2014                   |      |
|         |      | COD                    | MR   |
| 0year   | 1    | Congenital deformities | 91.5 | Congenital deformities | 83.8 | Congenital deformities | 85.4 | Congenital deformities | 81.9 | Congenital deformities | 77.8 | Congenital deformities | 78.4 | Congenital deformities | 70.4 |
|         | 2    | Respiration Disorders  | 34.6 | Respiration Disorders  | 33.7 | Respiration Disorders  | 34.1 | Respiration Disorders  | 30.5 | Respiration Disorders  | 30.2 | Respiration Disorders  | 29.9 | Respiration Disorders  | 24.6 |
|         | 3    | SIDS                   | 14.1 | SIDS                   | 13.5 | SIDS                   | 13.1 | accidental death       | 18.7 | SIDS                   | 13.6 | SIDS                   | 11.8 | SIDS                   | 0.2  |
|         | 4    | Accidental death       | 13.0 | Accidental death       | 11.4 | Accidental death       | 10.5 | SIDS                   | 12.3 | Accidental death       | 9.0  | Accidental death       | 8.6  | Haemorrhagic Diseases  | 0.3  |
|         | 5    | Haemorrhagic Diseases  | 11.7 | Haemorrhagic Diseases  | 9.3  | Haemorrhagic Diseases  | 7.9  | Haemorrhagic Diseases  | 8.1  | Haemorrhagic Diseases  | 7.8  | Haemorrhagic Diseases  | 7.4  | Accidental death       | 7.9  |
| 1-4year | 1    | Accidental death       | 3.8  | Congenital deformities | 3.8  | Congenital deformities | 3.8  | Accidental death       | 9.1  | Congenital deformities | 4.2  | Congenital deformities | 3.4  | Congenital deformities | 3.8  |
|         | 2    | Congenital deformities | 3.8  | Accidental death       | 3.5  | Accidental death       | 3.5  | Congenital deformities | 3.9  | Accidental death       | 2.9  | Accidental death       | 2.6  | Accidental death       | 2.6  |
|         | 3    | Cancer                 | 2.2  | Cancer                 | 2.0  | Cancer                 | 2.0  | Cancer                 | 1.9  | Cancer                 | 2.4  | Cancer                 | 2.0  | Cancer                 | 1.6  |
|         | 4    | Pneumonia              | 1.3  | Heart Diseases         | 1.5  | Pneumonia              | 1.7  | Pneumonia              | 1.8  | Heart Diseases         | 1.4  | Heart Diseases         | 1.3  | Heart Diseases         | 1.2  |
|         | 5    | Heart                  | 1.2  |                        | 1.0  | Heart                  | 1.3  | Heart                  | 1.4  | Pneumonia              | 1.1  | Pneumonia              | 1.3  | Pneumonia              | 1.2  |

1  
2  
3  
4  
5  
6  
7  
8  
9  
10  
11  
12  
13  
14  
15  
16  
17  
18  
19  
20  
21  
22  
23  
24  
25  
26  
27  
28  
29  
30  
31  
32  
33  
34  
35  
36  
37  
38  
39  
40  
41  
42  
43  
44  
45  
46  
47

|         |   | Diseases                |     | Diseases                |     | Diseases                |     | Diseases                |     | Diseases                |     | Diseases                             |     |                         |     |
|---------|---|-------------------------|-----|-------------------------|-----|-------------------------|-----|-------------------------|-----|-------------------------|-----|--------------------------------------|-----|-------------------------|-----|
| 5-9year | 1 | <b>Accidental death</b> | 2.2 | <b>Accidental death</b> | 2.2 | <b>Accidental death</b> | 2.3 | <b>Accidental death</b> | 6.5 | <b>Accidental death</b> | 1.9 | <b>Accidental death</b>              | 2.0 | Cancer                  | 1.9 |
|         | 2 | Cancer                  | 1.8 | Cancer                  | 1.8 | Congenital deformities  | 1.9 | Cancer                  | 1.8 | Cancer                  | 1.6 | Cancer                               | 2.0 | <b>Accidental death</b> | 1.7 |
|         | 3 | Other Cancers           | 0.7 | Heart Diseases          | 0.7 | Cancer                  | 0.5 | Other Cancers           | 0.7 | Congenital deformities  | 0.7 | Other Cancers                        | 0.7 | Congenital deformities  | 0.6 |
|         | 4 | Heart Diseases          | 0.6 | Other Cancers           | 0.6 | Pneumonia               | 0.5 | Congenital deformities  | 0.6 | Other Cancers           | 0.6 | Heart Diseases                       | 0.4 | Heart Diseases          | 0.5 |
|         | 5 | Congenital deformities  | 0.6 | Congenital deformities  | 0.6 | Heart Diseases          | 0.4 | Heart Diseases          | 0.5 | Pneumonia               | 0.5 | Pneumonia/<br>Congenital deformities | 0.4 | Pneumonia               | 0.5 |

review only

**Table 4** Factors affecting infant and child mortality during the study period

| Factors                                  | 2008–2010            |             |          | 2011                       |             |          | 2012–2014           |
|------------------------------------------|----------------------|-------------|----------|----------------------------|-------------|----------|---------------------|
|                                          | $\beta$              | <i>s.e.</i> | <i>p</i> | $\beta$                    | <i>s.e.</i> | <i>p</i> | $\beta$             |
| Intercept                                | 22.2 (–25.0, 69.4)   | 23.6        | –0.35    | –196.8<br>(–651.9, 258.3)  | 227.7       | (–0.9)   | –18.9 (–62.8, 25.1) |
| <b>Sex</b>                               |                      |             |          |                            |             |          |                     |
| Male                                     | –0.4 (–12.7, 11.9)   | 6.2         | –0.95    | –42.6<br>(–161.2, 76.0)    | 59.3        | –0.48    | 7.7 (–3.7, 19.2)    |
| Female                                   | Ref. group           |             |          | Ref. group                 |             |          | Ref. group          |
| <b>Age group</b>                         |                      |             |          |                            |             |          |                     |
| 0–4 years                                | 74.8* (62.4, 87.2)   | 6.2         | < 0.001  | 164.2* (45.1, 283.4)       | 59.6        | –0.01    | 49.7* (38.2, 61.3)  |
| 5–9 years                                | Ref. group           |             |          | Ref. group                 |             |          | Ref. group          |
| <b>Location of DBH</b>                   |                      |             |          |                            |             |          |                     |
| Inland                                   | Ref. group           |             |          | Ref. group                 |             |          | Ref. group          |
| Coastal                                  | 15 (–7.2, 37.3)      | 11.1        | –0.18    | 91.1 (–123.3, 305.4)       | 107.2       | –0.39    | –15.1 (–35.8, 5.6)  |
| <b>Location of DBH</b>                   |                      |             |          |                            |             |          |                     |
| Not along the coast                      | Ref. group           |             |          | Ref. group                 |             |          | Ref. group          |
| Along the coast                          | –11.4 (–44.6, 21.9)  | 16.6        | –0.49    | 370.8* (50.4, 691.1)       | 160.2       | –0.02    | 19.2 (–11.7, 50.2)  |
| <b>Prefecture</b>                        |                      |             |          |                            |             |          |                     |
| Iwate                                    | –16.9 (–56.5, 22.6)  | 19.8        | –0.39    | 245.7<br>(–135.2, 626.6)   | 190.6       | –0.2     | 13.3 (–23.5, 50.1)  |
| Miyagi                                   | –31.9* (–63.4, –0.6) | 15.8        | –0.05    | –195.4<br>(–497.8, 107.1)  | 151.3       | –0.2     | –12.7 (–41.9, 16.5) |
| Fukushima                                | Ref. group           |             |          | Ref. group                 |             |          | Ref. group          |
| <b>Pediatrics per 100 000 population</b> |                      |             |          |                            |             |          |                     |
|                                          | –0.6 (–2.1, 1.0)     | 4.5         | –0.79    | –64.2<br>(–150.3, 21.9)    | 7.7         | –0.6     | 1.2 (–0.2, 2.7)     |
| <b>Pediatrician</b>                      |                      |             |          |                            |             |          |                     |
|                                          | 0.0 (–0.2, 0.2)      | 0.1         | –0.09    | –0.3 (–2.0, 1.5)           | 0.9         | –0.76    | 0.0 (–0.2, 0.2)     |
| <b>Ob-Gyn</b>                            |                      |             |          |                            |             |          |                     |
|                                          | 12.3 (–4.6, 29.2)    | 8.5         | –0.15    | –189.9*<br>(–352.9, –26.8) | 81.6        | –0.02    | 0.9 (–16.7, 14.8)   |

|   |                              |                  |     |       |             |      |       |                 |
|---|------------------------------|------------------|-----|-------|-------------|------|-------|-----------------|
| 1 | <b><i>Ob-Gyn per 100</i></b> |                  |     |       | -64.2       |      |       |                 |
| 2 | <b><i>000 population</i></b> | 0.4 (-8.5, 9.4)  | 4.5 | -0.92 | (-150.3,    | 43.1 | -0.14 | 5.0 (-13.3,     |
| 3 |                              |                  |     |       | 21.9)       |      |       | 3.3)            |
| 4 |                              |                  |     |       |             |      |       |                 |
| 5 | <b><i>Ob-Gyn Dr.</i></b>     | -0.5 (-1.2, 0.2) | 0.4 | -0.17 | -2.1 (-9.1, | 3.5  | -0.56 | -0.1 (-0.8,     |
| 6 |                              |                  |     |       | 5.0)        |      |       | 0.5)            |
| 7 |                              |                  |     |       |             |      |       |                 |
| 8 | <b><i>PHN</i></b>            | -                | -   | -     | -1.7* (0.4, | 0.6  | -0.01 | 0.0 (-0.1, 0.2) |
| 9 |                              |                  |     |       | 2.9)        |      |       |                 |

*Note:* DBH, disaster base hospital; PHN; public health nurse; s.e., standard error. \*p<0.05.

## DISCUSSION

The results of this analysis indicate the need to improve the accessibility of local medical facilities, simulate a transportation scenario during emergency situations, and pre-assign residents to local hospitals during emergencies[20]. However, previous studies did not focus on the influence of the spatial ecology on infant and child mortality. Access to medical care for infants and children can be improved by establishing a liaison system with the local child care system to compensate for the potential lack of healthcare resources.

This study revealed mortality differences between normal and abnormal periods, i.e., before, during and after the 2011 earthquake and tsunami by sex, age group, and SMA. Disaster impact on child mortality was associated with abnormalities. Several studies have reported that the availability of medical resources in a prefecture affects the rate of child mortality, particularly in Iwate that has a poor medical service system; as such, there is the need to amend the evaluation standards of existing medical centers[21, 22]. Iwate needs to support the recovery of children and their caregivers during and after the March 2011 GEJET. Another previous study reported that medical facilities are forced to integrate or discontinue due to the declining population. The policy to control the medical expense due to worsening fiscal conditions, loss of medical liaison between medical education institutions and regional/rural hospitals were also associated with imbalanced medical resource allocation[21]. Developing obstetrics and disaster preparedness is an urgent

1 issue for proper child care accessibility (e.g., information on evacuation, available hospitals, preparation in  
2  
3 and for a disaster, and geographical materials) in disaster-affected rural areas. Based on the lessons learned  
4  
5 from the absence of liaison between DMATs and local medical care organizations, there was a demand to set  
6  
7 a liaison system for pediatric and perinatal medical care during disasters in 2016.  
8  
9

10  
11 The Child Care, Emergency Preparedness Toolbox, developed by the General Services  
12  
13 Administration[23] details how to deal with child care and support liaison systems. However, Japan has not  
14  
15 established an official child care emergency disaster plan yet, although an information service for infants  
16  
17 and perinatal disaster liaison is currently being studied. Few studies have focused on the effect of employing  
18  
19 PHNs to mitigate child health risk. However, this result suggests that lack of obstetric units following a  
20  
21 disaster made proper infant and child care difficult. This study showed that grasping geographical medical  
22  
23 resource distribution allows the enhancement of information liaison between health systems and medical  
24  
25 units. To establish the liaison system, the numerous issues faced by disaster-affected individuals should be  
26  
27 comprehensively addressed, and management should include enhancing the support structure, schemes to  
28  
29 form communities, reconstruction of the disaster-affected areas, support for children, and a system for  
30  
31 sharing of information among healthcare infrastructures.  
32  
33  
34  
35  
36  
37  
38  
39  
40  
41  
42  
43

#### 44 **Principal findings**

45  
46 We observed that healthcare disparities by region remained statistically significantly associated with infant  
47  
48 death. A total of 7 out of the 32 DBHs located in the coastal zones were related to the risk of infant and child  
49  
50 death in 2011; the child mortality rate was higher in coastal zones than that in the inland zones. From 2008  
51  
52 to 2012, accidents was in the top five causes of death among children aged 0–9 years. This result indicated  
53  
54 that infants and children are exposed to accidents regardless of disaster outbreaks. In 2011, we found that the  
55  
56  
57  
58  
59



1 mortality rate in the coastal zone was ten times higher than that in the inland zone. The mortality rate in  
2  
3  
4 2011 increased 11-fold compared to that before and after 2011 when no tsunami had occurred. Furthermore,  
5  
6 the mortality rate of children younger than 5 years was 164.2 times higher than that of children younger than  
7  
8  
9 10 years in 2011.

### 13 **The accuracy of the case, exposure, and outcome identification**

16 Our study analyzed ecological data collected from the databases of *e-Stat*, DWH, JMAP, and MIL which are  
17  
18 widely used databases in Japan. However, misclassification of the data is possible, and the definition of the  
19  
20 point where and how to count the number of migrants and immigrants is uncertain. Regarding general  
21  
22 practitioners, pediatricians, and Ob-Gyn doctors, we applied data only registered in JMAP. Data for  
23  
24 mortality rate was calculated via the Residential Basic Book in the SMAs. As such, data of some infants and  
25  
26 children may be missing. However, these data are official reports from the Japanese government. Thus, the  
27  
28 validity of our calculated data is guaranteed.  
29  
30  
31  
32  
33  
34  
35  
36  
37

### 38 **Study limitations**

41 Our study has several limitations. First, for 2008–2010 and 2012–2014, the mean data of three years were  
42  
43 used in the analysis. As such, some inconsistencies may be present from the real data for each year.  
44  
45  
46 Nevertheless, the period analyzed in the current study appears to be long enough to identify the causes of  
47  
48 death and determine the ecological characteristics related to the mortality of children younger than 10 years.  
49  
50 The changing trends in human casualties caused by northeastern disasters indicated that ecological factors  
51  
52 are associated with childhood mortality. Second, the study failed to include individual social and economic  
53  
54 factors related to deaths due to natural disasters. Vulnerability, such as the effects of natural disasters on  
55  
56  
57  
58  
59

1 health, depends on personal characteristics, including the location of residence, age, income, education, and  
2  
3 disability, as well as economic factors, including socio-economic status of parents and the budget of the  
4  
5 healthcare facilities in each SMA during disasters[24, 25]. Our study did not consider these factors during  
6  
7 the analysis due to the limitations of population-based ecological data. Furthermore, many people were  
8  
9 killed by the tsunami on March 11 2011, but we could not estimate the biased results on the date because we  
10  
11 obtained only annual data. There might exist location bias of DBH in coastal areas. We should also have  
12  
13 focused on normal days of accidents. However, we used annual data and could only compare normal  
14  
15 accident spans before and after 2011 and abnormal accidents in 2011. The limitation, however, applies to  
16  
17 most previous studies that assessed the impacts on mortality of children younger than 10 years using  
18  
19 ecological data.  
20  
21  
22  
23  
24  
25  
26  
27  
28  
29  
30  
31  
32  
33

### 34 **Abbreviations**

35  
36 GEJET: Great East Japan Earthquake and Tsunami; SMA: Secondary Medical Area; DMAT: Disaster  
37  
38 Medical Assistance Team; DWH: Data Warehouse for Healthcare and Welfare Plan; JMAP: Japan Medical  
39  
40 Analysis Platform; JAOG: Japan Association of Obstetricians and Gynecologists; MIL: Medicare  
41  
42 Information Laboratory; DBH: Disaster Base Hospital; CDMH: Core Disaster Medical Hospital; LDMC:  
43  
44 Local Disaster Medical Center; PMC: Perinatal Medical Center; Ob-Gyn: Obstetrician and Gynecologist  
45  
46 center; PHN: Public Health Nurse; ITK: Ishinomaki-Tome- Kesenuma; SD: Standard deviation; *s.e.*:  
47  
48 Standard error; COD: Causes of death; MR: Mortality rate; N/A: Not applicable.  
49  
50  
51  
52  
53  
54  
55  
56  
57  
58  
59  
60

**DECLARATIONS**

Ethics approval and consent to participate

Not applicable.

Consent for publication

Not applicable.

Competing interests

The authors declare that they have no competing interests.

Authors' contributions

AT designed the study and methodology, conducted the analysis, and drafted the manuscript. KS and HY assisted in manuscript preparation, and revised the draft. EO provided data sources, study materials, and revised the manuscript. All authors read and approved the final manuscript.

Provenance and peer review

Not commissioned; externally peer reviewed

Data sharing statement

No additional data available.

**Funding**

1 This work was supported by the JSPS KAKENHI Grant Number 17K12623 and Japan Agency for Medical  
2  
3  
4 Research and Development, “Personal Health Record (PHR) Research Project, PHR 331 Model for  
5  
6 Supporting Pregnancy, Delivery, and Childbearing” (FY 2016-2018); Grant No. 160110001j0101.  
7  
8  
9  
10  
11  
12  
13  
14  
15  
16  
17  
18  
19  
20  
21  
22  
23  
24  
25  
26  
27  
28  
29  
30  
31  
32  
33  
34  
35  
36  
37  
38  
39  
40  
41  
42  
43  
44  
45  
46  
47  
48  
49  
50  
51  
52  
53  
54  
55  
56  
57  
58  
59  
60

For peer review only

**REFERENCES**

- 1 Kousky C. Impacts of Natural Disasters on Children. *Future Child* 2016;26:73–92.
- 2 Cabinet Office, Government of Japan. White Paper on Disaster Management 2011.  
http://www.bousai.go.jp/kaigirep/hakusho/h23/bousai2011/html/honbun/index.htm (in Japanese)  
(accessed 8 Sep 2017).
- 3 Nelson S, Luten J, Jones K, et al. Mortality associated with Hurricane Katrina-Florida and Alabama, August-October 2005. *MMWR Morb Mortal Wkly Rep* 2006;55:239–42.
- 4 Jonkman SN, Maaskant B, Boyd E, et al. Loss of life caused by the flooding of New Orleans after Hurricane Katrina: analysis of the relationship between flood characteristics and mortality. *Risk Anal* 2009;29:676–98.
- 5 American Red Cross. American Red Cross & Public Health: The Response to Hurricane Katrina and Beyond, Report to ARC Disaster Health Services, March, 2006 Operation DR # 865 Working Group on the American Red Cross Public Health Response to Hurricane Katrina: The Harvard Humanitarian Initiative of Harvard School of Public Health. The John Hopkins Bloomberg School of Public Health.
- 6 Ushizawa H, Foxwell AR, Bice S, et al. Needs for disaster medicine: lessons from the field of the Great East Japan Earthquake. *Western Pac Surveill Response J* 2012;4:51–5.
- 7 Iwata O, Kawase A, Iwai M, et al. Evacuation of a Tertiary Neonatal Centre: Lessons from the 2016 Kumamoto Earthquakes. *Neonatology* 2017;112:92–6.
- 8 Osofsky J, Osofsky H. Lessons Learned About the Impact of Disasters on Children and Families and Post-disaster Recovery. In: Culp A. (ed). *Child and Family Advocacy. Issues in Clinical Child Psychology*. New York: Springer 2013:91–105.

- 1 9 Datar A, Liu J, Linnemayr S, et al. The impact of natural disasters on child health and investments in  
2 rural India. *Soc Sci Med* 2013;76:83–91.
- 3  
4  
5  
6 10 Nakahara S, Ichikawa M. Mortality in the 2011 tsunami in Japan. *J Epidemiol* 2013;23:70–3.
- 7  
8  
9 11 e-Stat, Portal Site of Official Statistics of Japan. Statistics of Japan.  
10  
11  
12 <http://www.e-stat.go.jp/SG1/estat/eStatTopPortalE.do> (in Japanese) (accessed 1 Sep 2017).
- 13  
14  
15 12 Data Warehouse for Healthcare and Welfare Plan. <http://jmedicine.com/> (in Japanese) (accessed 21 Aug  
16  
17 2017).
- 18  
19  
20 13 Japan Medical Analysis Platform. <http://jmap.jp/pages/guide> (in Japanese) (accessed 21 Aug 2017).
- 21  
22  
23 14 Japan Association of Obstetricians and Gynecologists. <http://www.jaog.or.jp/> (in Japanese) (accessed 21  
24  
25 Aug 2017).
- 26  
27  
28  
29 15 Japanese Ministry of Health, Labour and Welfare. List of disaster-ready hospitals. [http://](http://www.mhlw.go.jp/seisakunitsuite/bunya/kenkou_iryou/iryou/saigai_iryou/dl/saigai_iryou07.pdf)  
30  
31 [www.mhlw.go.jp/seisakunitsuite/bunya/kenkou\\_iryou/iryou/saigai\\_iryou/dl/saigai\\_iryou07.pdf](http://www.mhlw.go.jp/seisakunitsuite/bunya/kenkou_iryou/iryou/saigai_iryou/dl/saigai_iryou07.pdf) (in  
32  
33 Japanese) (accessed 1 Sep 2017).
- 34  
35  
36  
37 16 The National Police Agency. Damage situation and police countermeasures associated with 2011  
38  
39 Tohoku district — off the Pacific Coastal Earthquake.  
40  
41  
42 <https://www.npa.go.jp/archive/keibi/syouten/syouten281/pdf/ALL.pdf> (in Japanese) (accessed 21 Aug  
43  
44 2017).
- 45  
46  
47  
48 17 Chang KT. Geographic Information System. In: Richardson D, Castree N, Goodchild MF, et al., eds.  
49  
50 International Encyclopedia of Geography: People, the Earth, Environment and Technology. New York:  
51  
52 John Wiley & Sons Mar 2017.
- 53  
54  
55  
56  
57 18 Esri. <https://www.esri.com/en-us/home> (accessed 21 Aug 2017).
- 58  
59  
60

- 1 19 STATA. <https://www.stata.com/stata14/> (accessed 21 Aug 2017).
- 2
- 3
- 4 20 Sanuki R, Satoh E, Kumakawa T, et al. Accessibility to medical care in case of major disasters. *Journal*
- 5
- 6 *of the National Institute of Public Health* 2013;62:52–61.
- 7
- 8
- 9 21 Eiji S, Toshiro K. Establishing medical care area from residents perspectives: The accessibility of
- 10
- 11 critical care in Kanagawa Prefecture and Iwate Prefecture as case studies. *Journal of the National*
- 12 *Institute of Public Health* 2013;62:46–51.
- 13
- 14
- 15
- 16
- 17 22 Masami I, Takashi N, Masami I. Emergency Medicine in Japan, JMA Policies. *Japan Med Assoc J*
- 18
- 19 2009;52: 211–13.
- 20
- 21
- 22
- 23 23 General Services Administration Public Buildings Service, Child Care Division. Child Care Emergency
- 24
- 25 Preparedness Toolbox, 2011.
- 26
- 27 [https://www.gsa.gov/graphics/pbs/Child\\_Care\\_Emergency\\_Preparedness\\_Toolbox.pdf](https://www.gsa.gov/graphics/pbs/Child_Care_Emergency_Preparedness_Toolbox.pdf) (in Japanese)
- 28
- 29 (accessed 21 Aug 2017).
- 30
- 31
- 32
- 33
- 34 24 Myung HN, Jang JY. Causes of death and demographic characteristics of victims of meteorological
- 35
- 36 disasters in Korea from 1990 to 2008. *Environ Health* 2011;10:82.
- 37
- 38
- 39
- 40 25 Mata-Lima H, Alvino-Borba A, Pinheiro A, et al. Impacts of natural disasters on environmental and
- 41
- 42 socio-economic systems: what makes the difference?
- 43
- 44 [http://www.scielo.br/scielo.php?pid=S1414-753X2013000300004&script=sci\\_arttext&tlng=en#nota](http://www.scielo.br/scielo.php?pid=S1414-753X2013000300004&script=sci_arttext&tlng=en#nota)
- 45
- 46
- 47 (accessed 21 Aug 2017).
- 48
- 49
- 50
- 51
- 52
- 53
- 54
- 55
- 56
- 57
- 58
- 59
- 60

**\*Figure 1\***

Note: Municipalities severely damaged by the tsunami were included in the analysis and classified into three areas according to their geographic characteristics. The boundary indicates secondary medical areas (SMAs) in each prefecture. \*

**\*Figure 2\***

Figure 2-a. Location of DBHs including CDMHs and LDMCs. Figure 2-b. Medical facilities. DBH: disaster base hospital; PMC: perinatal medical center (central and local).

**\*Figure 5\***

Figure 5-a. Number of infant deaths (aged 0 years). Figure 5-b. Number of infant deaths (aged 0 years). Figure 5-c. Number of infant deaths (aged 0 years)



1  
2  
3  
4  
5  
6  
7  
8  
9  
10  
11  
12  
13  
14  
15  
16  
17  
18  
19  
20  
21  
22  
23  
24  
25  
26  
27  
28  
29  
30  
31  
32  
33  
34  
35  
36  
37  
38  
39  
40  
41  
42  
43  
44  
45  
46  
47  
48  
49  
50  
51  
52  
53  
54  
55  
56  
57  
58  
59  
60



Municipalities severely damaged by the tsunami were included in the analysis and were classified into 3 areas according to their geographic characteristics. The boundary indicates secondary medical area (SMA) in each prefecture.

180x128mm (300 x 300 DPI)

W only

1  
2  
3  
4  
5  
6  
7  
8  
9  
10  
11  
12  
13  
14  
15  
16  
17  
18  
19  
20  
21  
22  
23  
24  
25  
26  
27  
28  
29  
30  
31  
32  
33  
34  
35  
36  
37  
38  
39  
40  
41  
42  
43  
44  
45  
46  
47  
48  
49  
50  
51  
52  
53  
54  
55  
56  
57  
58  
59  
60



Figure 2-a. Location of DBH including CDMH and LDMC.

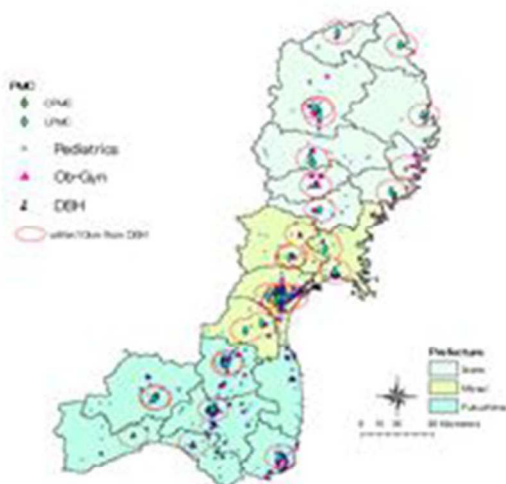

Figure 2-b. Medical facilities, DEH: Disaster Base hospital  
 PMC: Perinatal Medical Center (Central and Local), pediatrics, and Ob-Gyn.

Figure 2-a. Location of DBH including CDMH and LDMC. Figure 2-b. Medical facilities. DBH: Disaster Base hospital PMC: Perinatal Medical Center (Central and Local).

90x127mm (300 x 300 DPI)

1  
2  
3  
4  
5  
6  
7  
8  
9  
10  
11  
12  
13  
14  
15  
16  
17  
18  
19  
20  
21  
22  
23  
24  
25  
26  
27  
28  
29  
30  
31  
32  
33  
34  
35  
36  
37  
38  
39  
40  
41  
42  
43  
44  
45  
46  
47  
48  
49  
50  
51  
52  
53  
54  
55  
56  
57  
58  
59  
60



194x118mm (300 x 300 DPI)

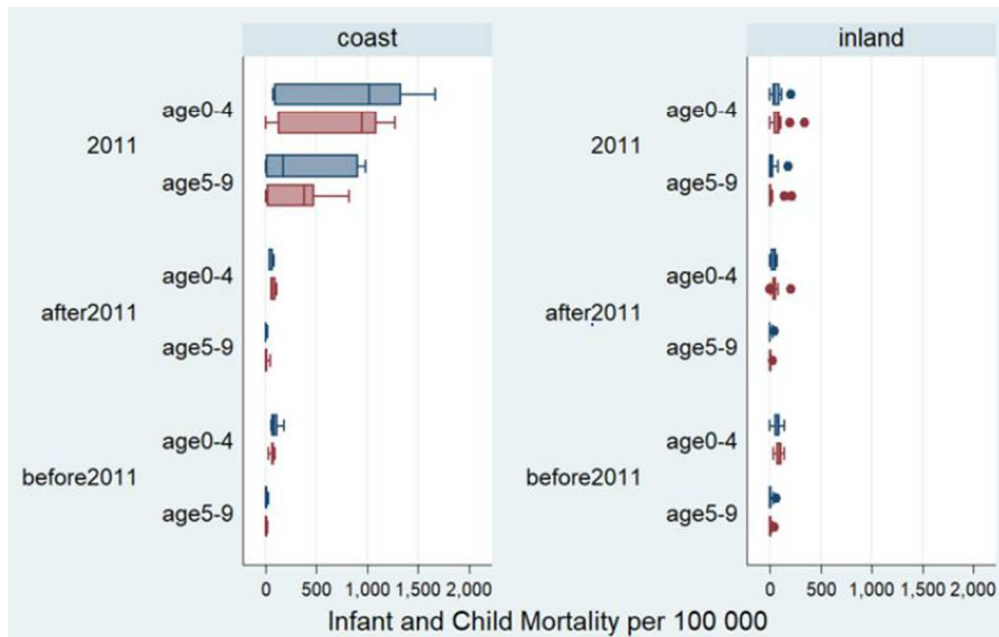

200x126mm (300 x 300 DPI)

1  
2  
3  
4  
5  
6  
7  
8  
9  
10  
11  
12  
13  
14  
15  
16  
17  
18  
19  
20  
21  
22  
23  
24  
25  
26  
27  
28  
29  
30  
31  
32  
33  
34  
35  
36  
37  
38  
39  
40  
41  
42  
43  
44  
45  
46  
47  
48  
49  
50  
51  
52  
53  
54  
55  
56  
57  
58  
59  
60

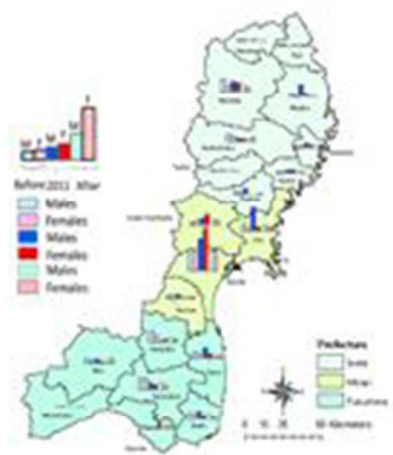

Fig.5-a. Number of infant death (aged 0 years)

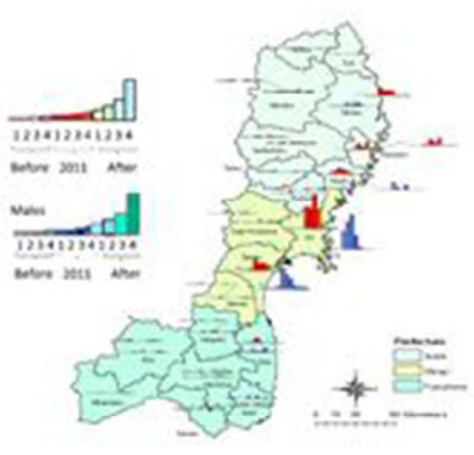

Fig.5-b. Number of child death (aged 1-4 years)

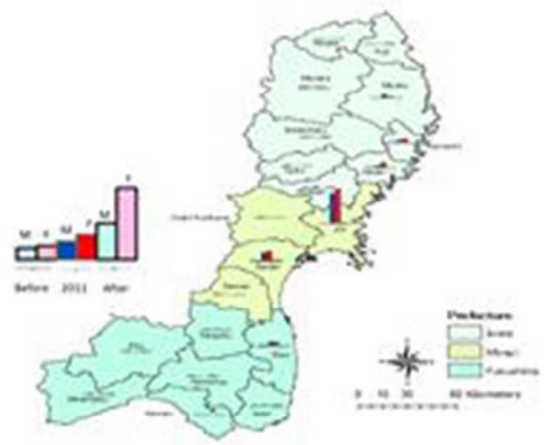

Fig.5-c. Number of child death (aged 5-9 years)

Figure 5-a. Number of infant death (aged 0 years). Figure 5-b. Number of infant death (aged 0 years).  
Figure 5-c. Number of infant death (aged 0 years)

99x107mm (300 x 300 DPI)
